# Supplementary material
Source: ML conference proceedings conference paper supplement (https://openreview.net/forum?id=X7-y2_vjvk)

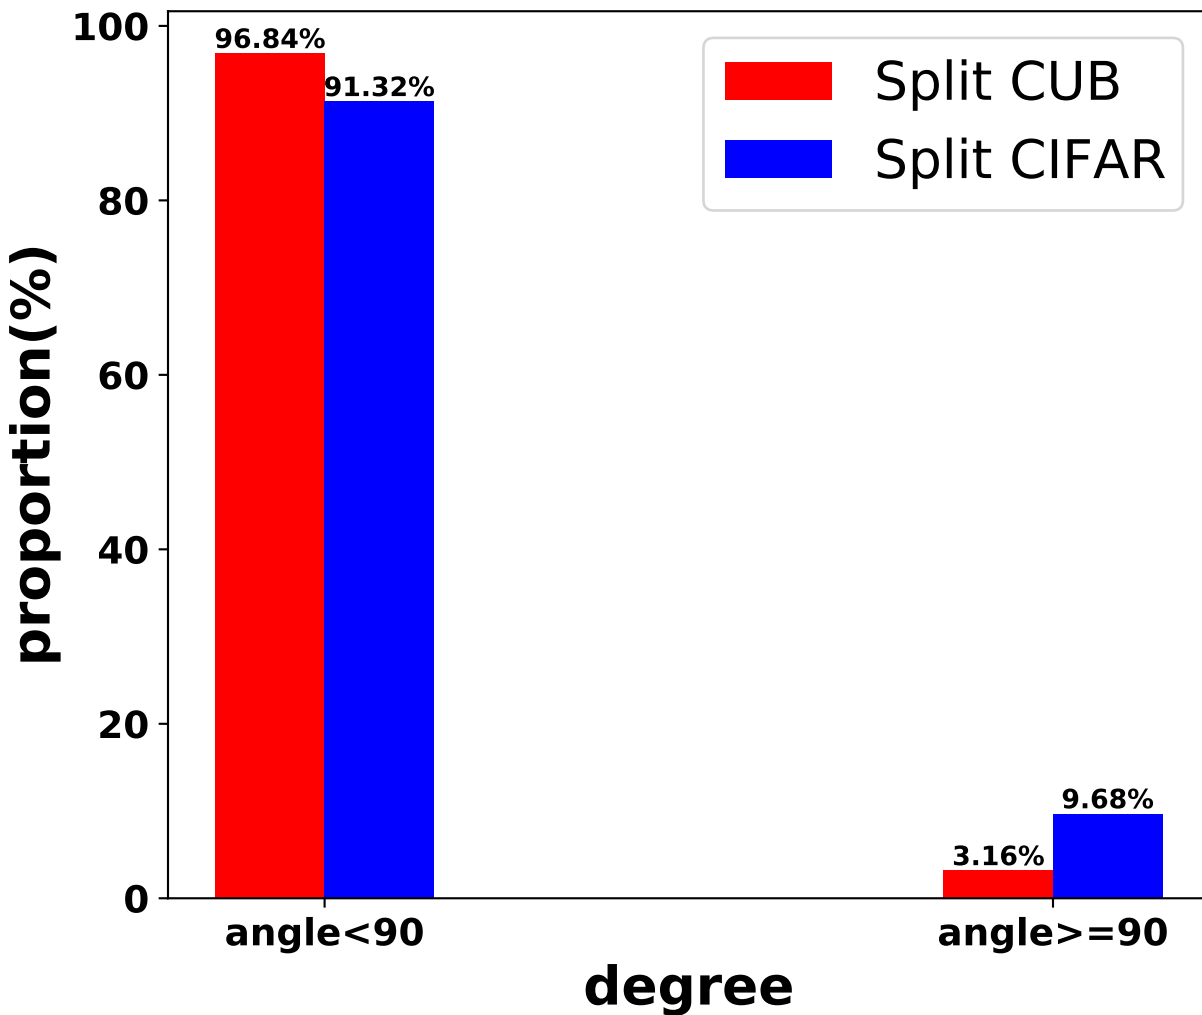

Supplement: supplementary_material [file attachment]

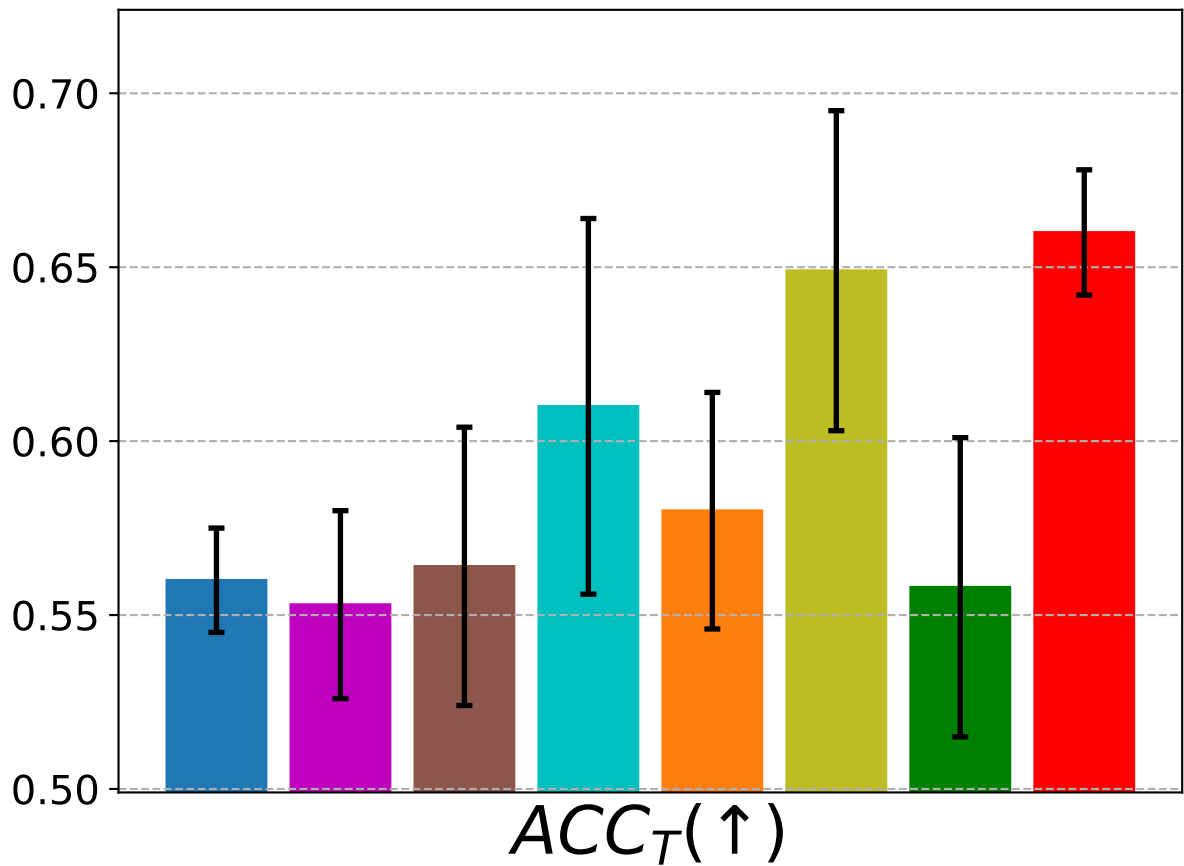

Supplement: supplementary_material [file attachment]

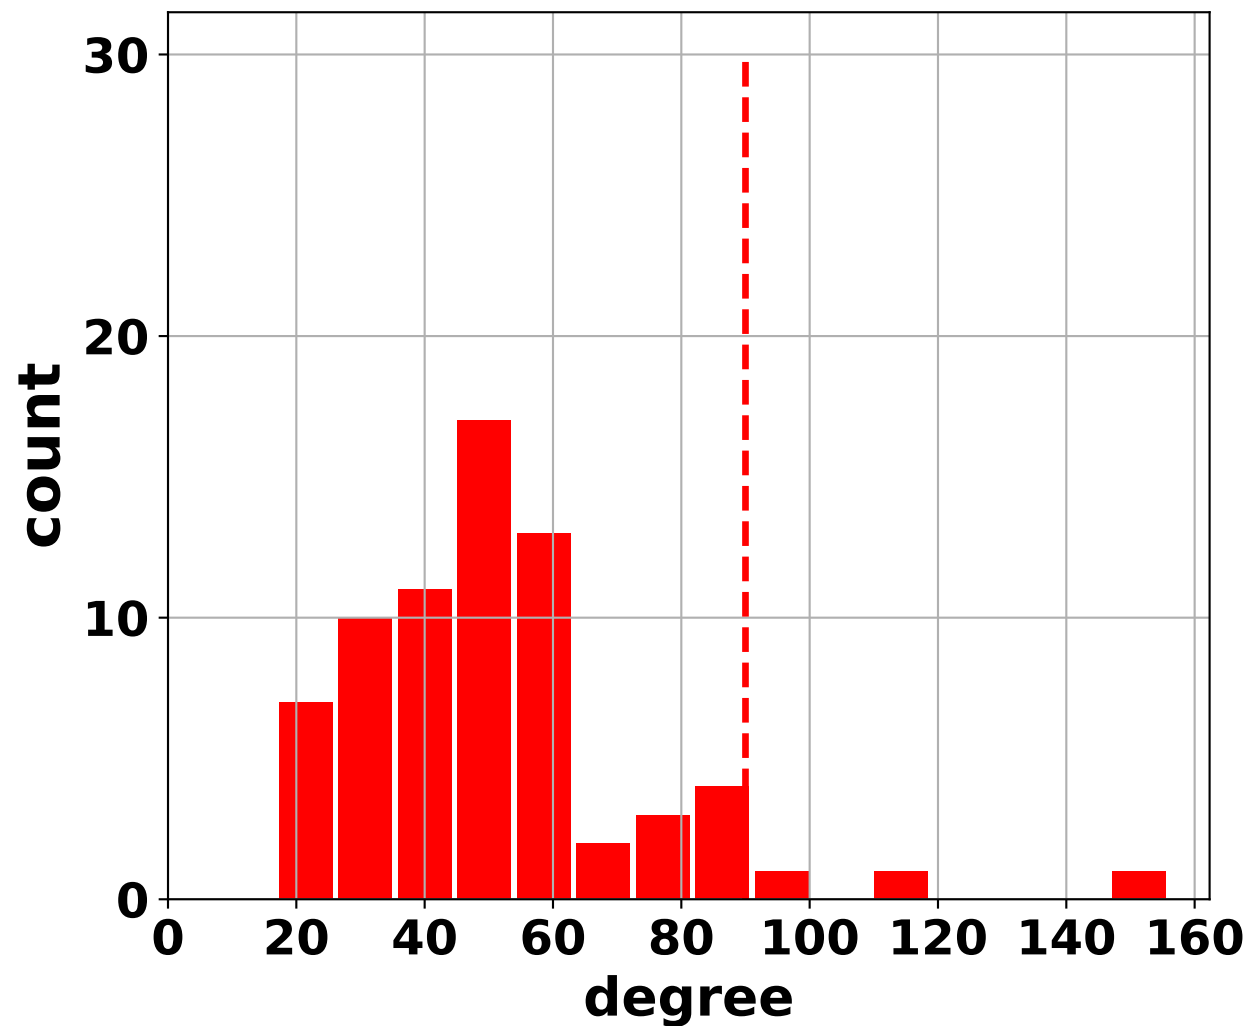

Supplement: supplementary_material [file attachment]

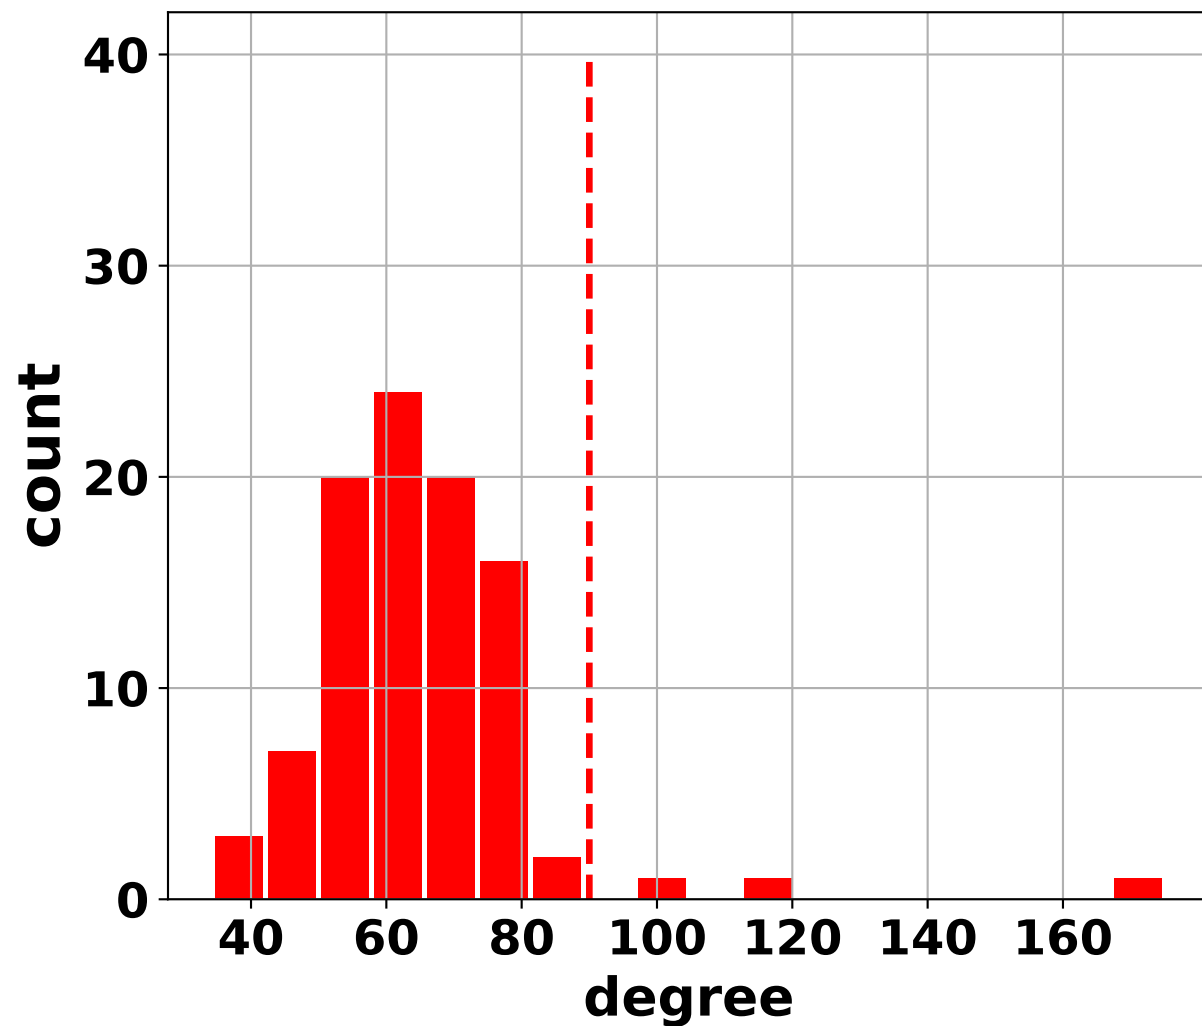

Supplement: supplementary_material [file attachment]

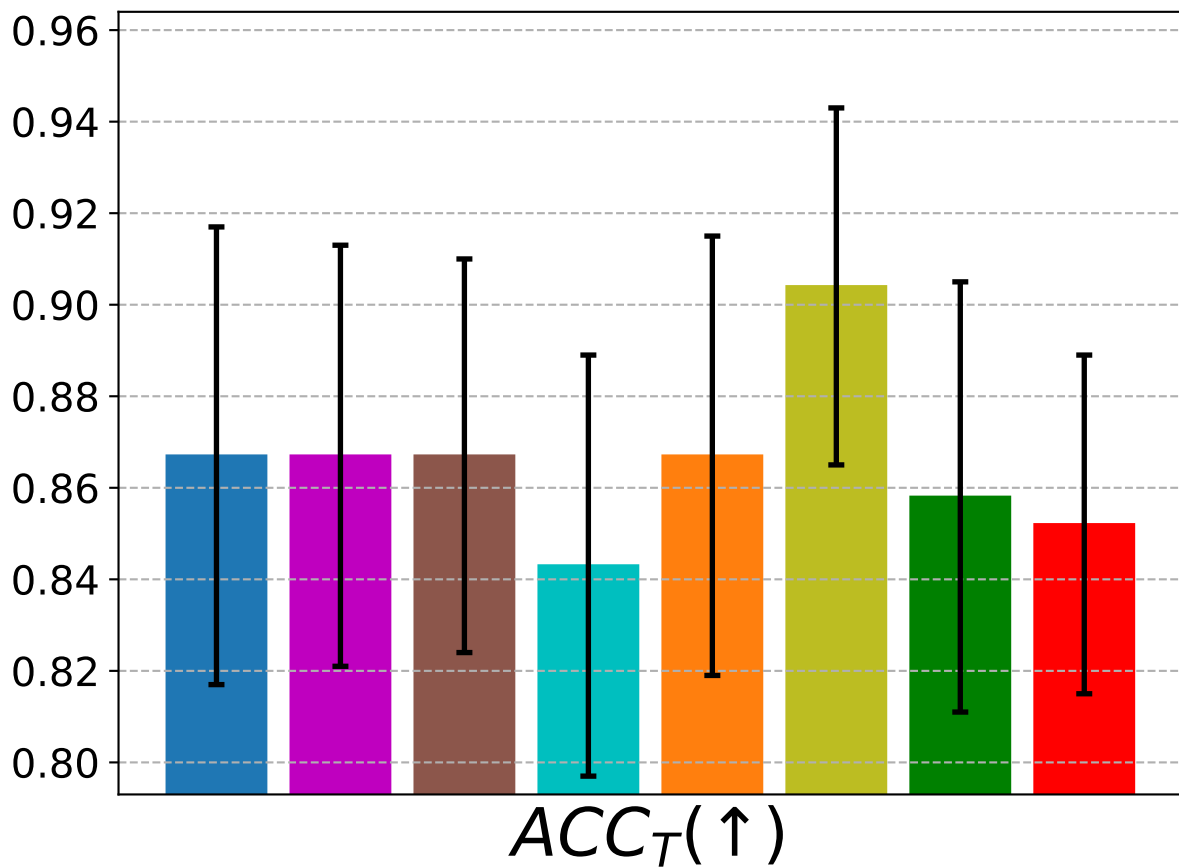

Supplement: supplementary_material [file attachment]

Distributions of the angles between  $g_{ref}$  and  $g_{cur}$

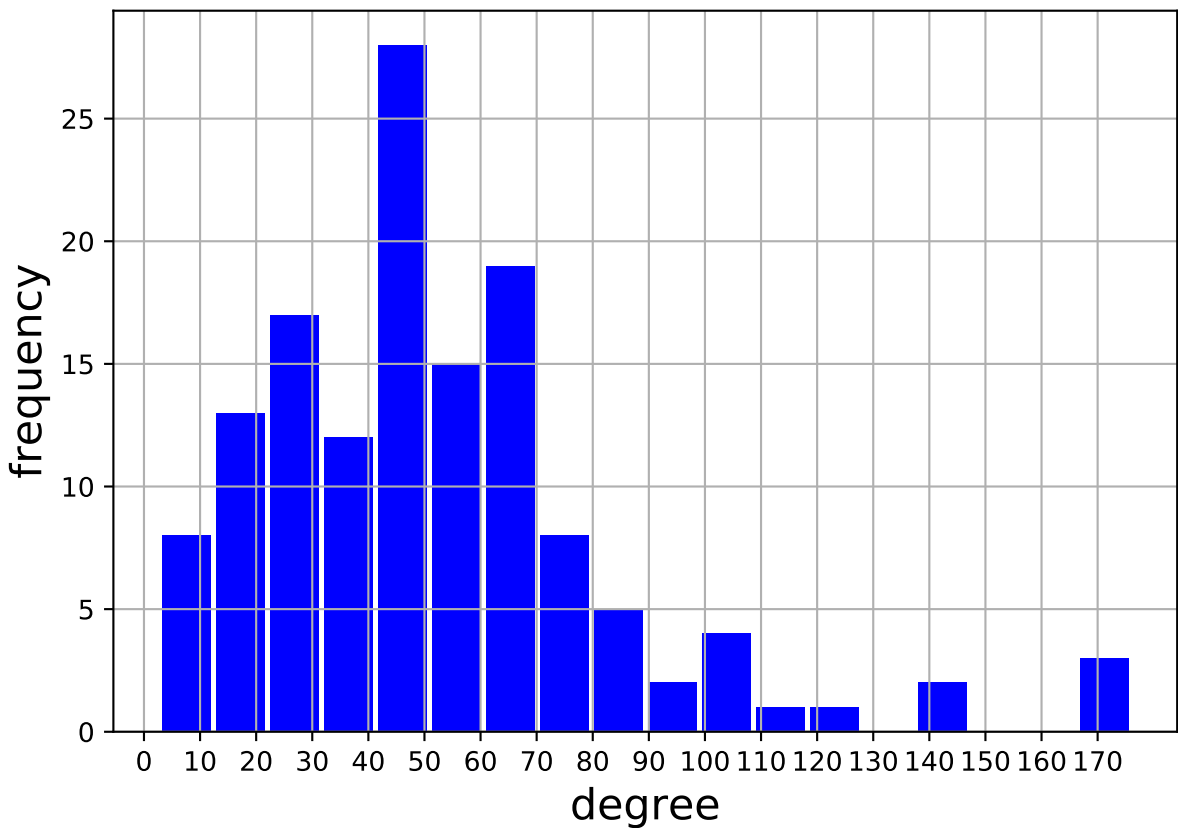

Supplement: supplementary_material [file attachment]

**Balanced data**

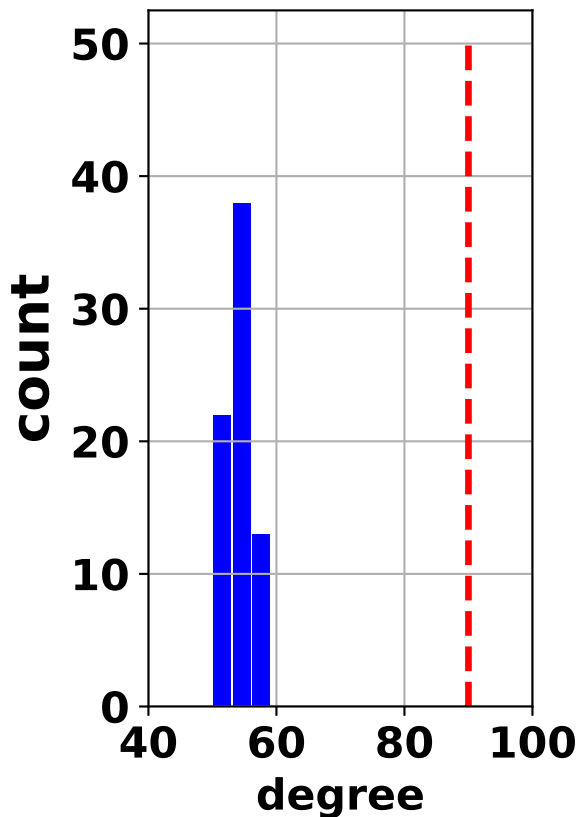

**Imbalanced data**

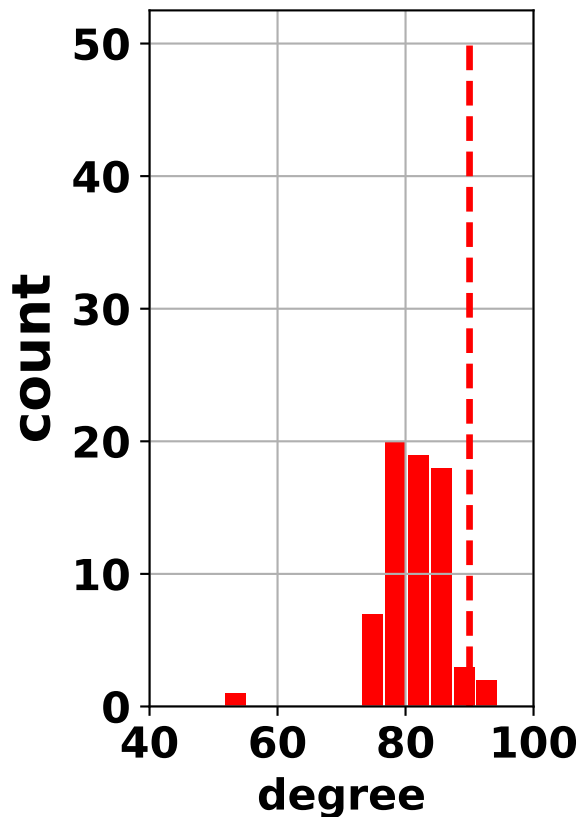

Supplement: supplementary_material [file attachment]

Avg AUC

0.65  
0.60  
0.55  
0.50

0 2 4 6 8 10 12 14 16 18 20

Tasks

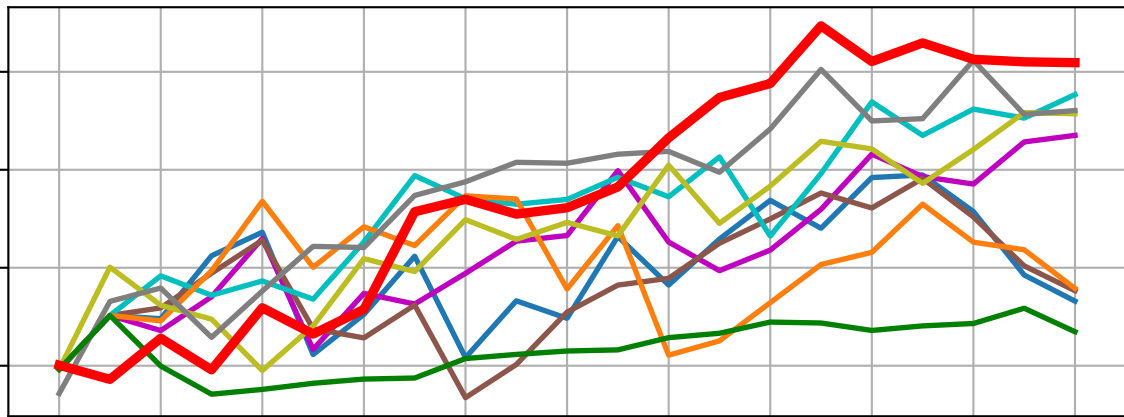

Supplement: supplementary_material [file attachment]

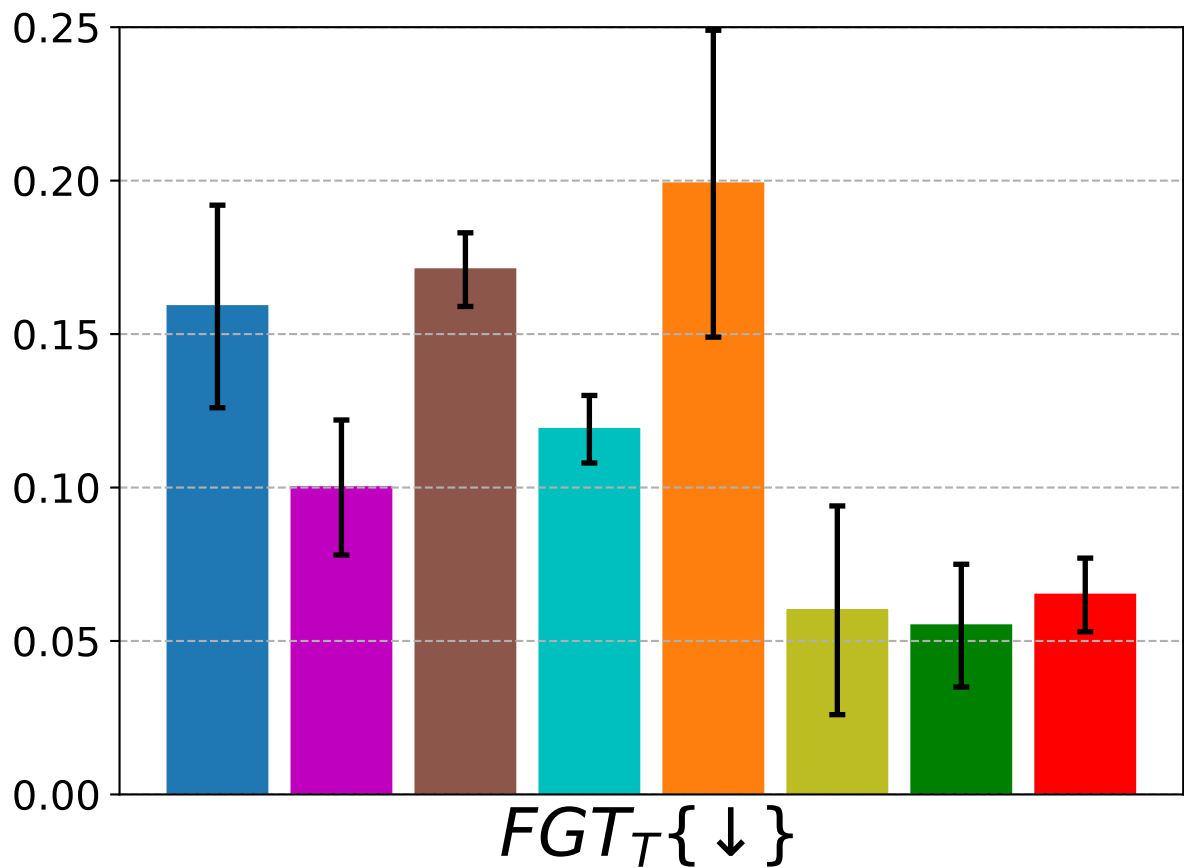

Supplement: supplementary_material [file attachment]

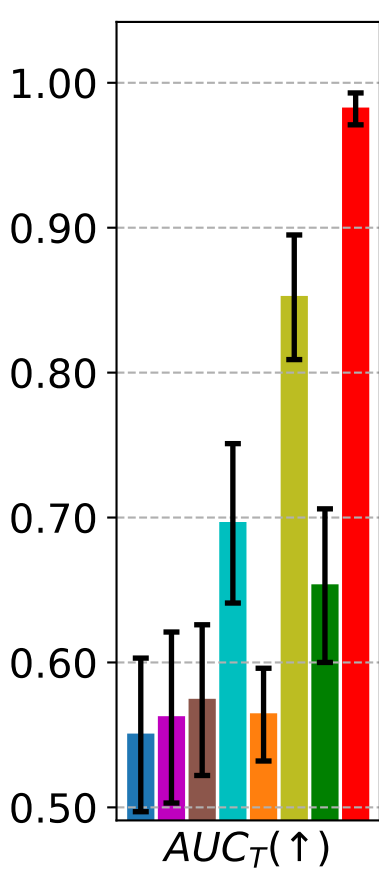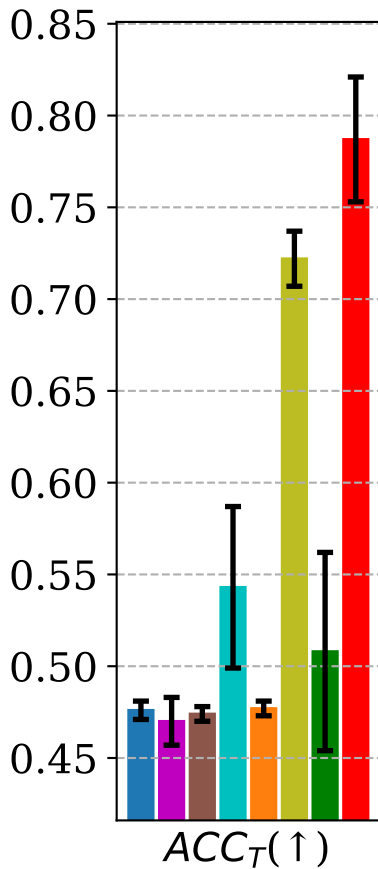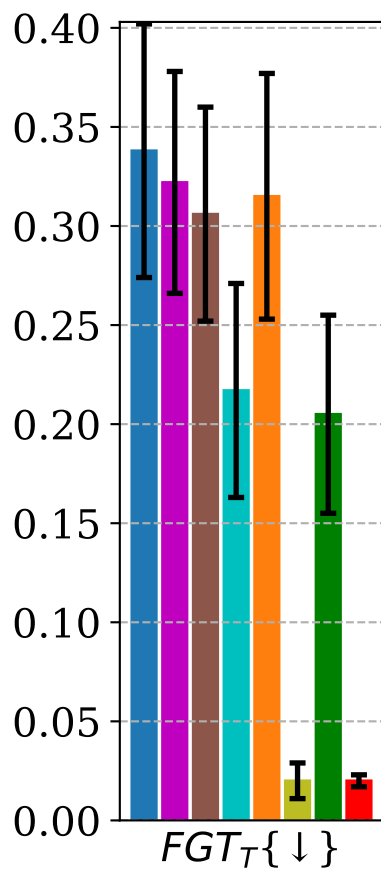

Supplement: supplementary_material [file attachment]

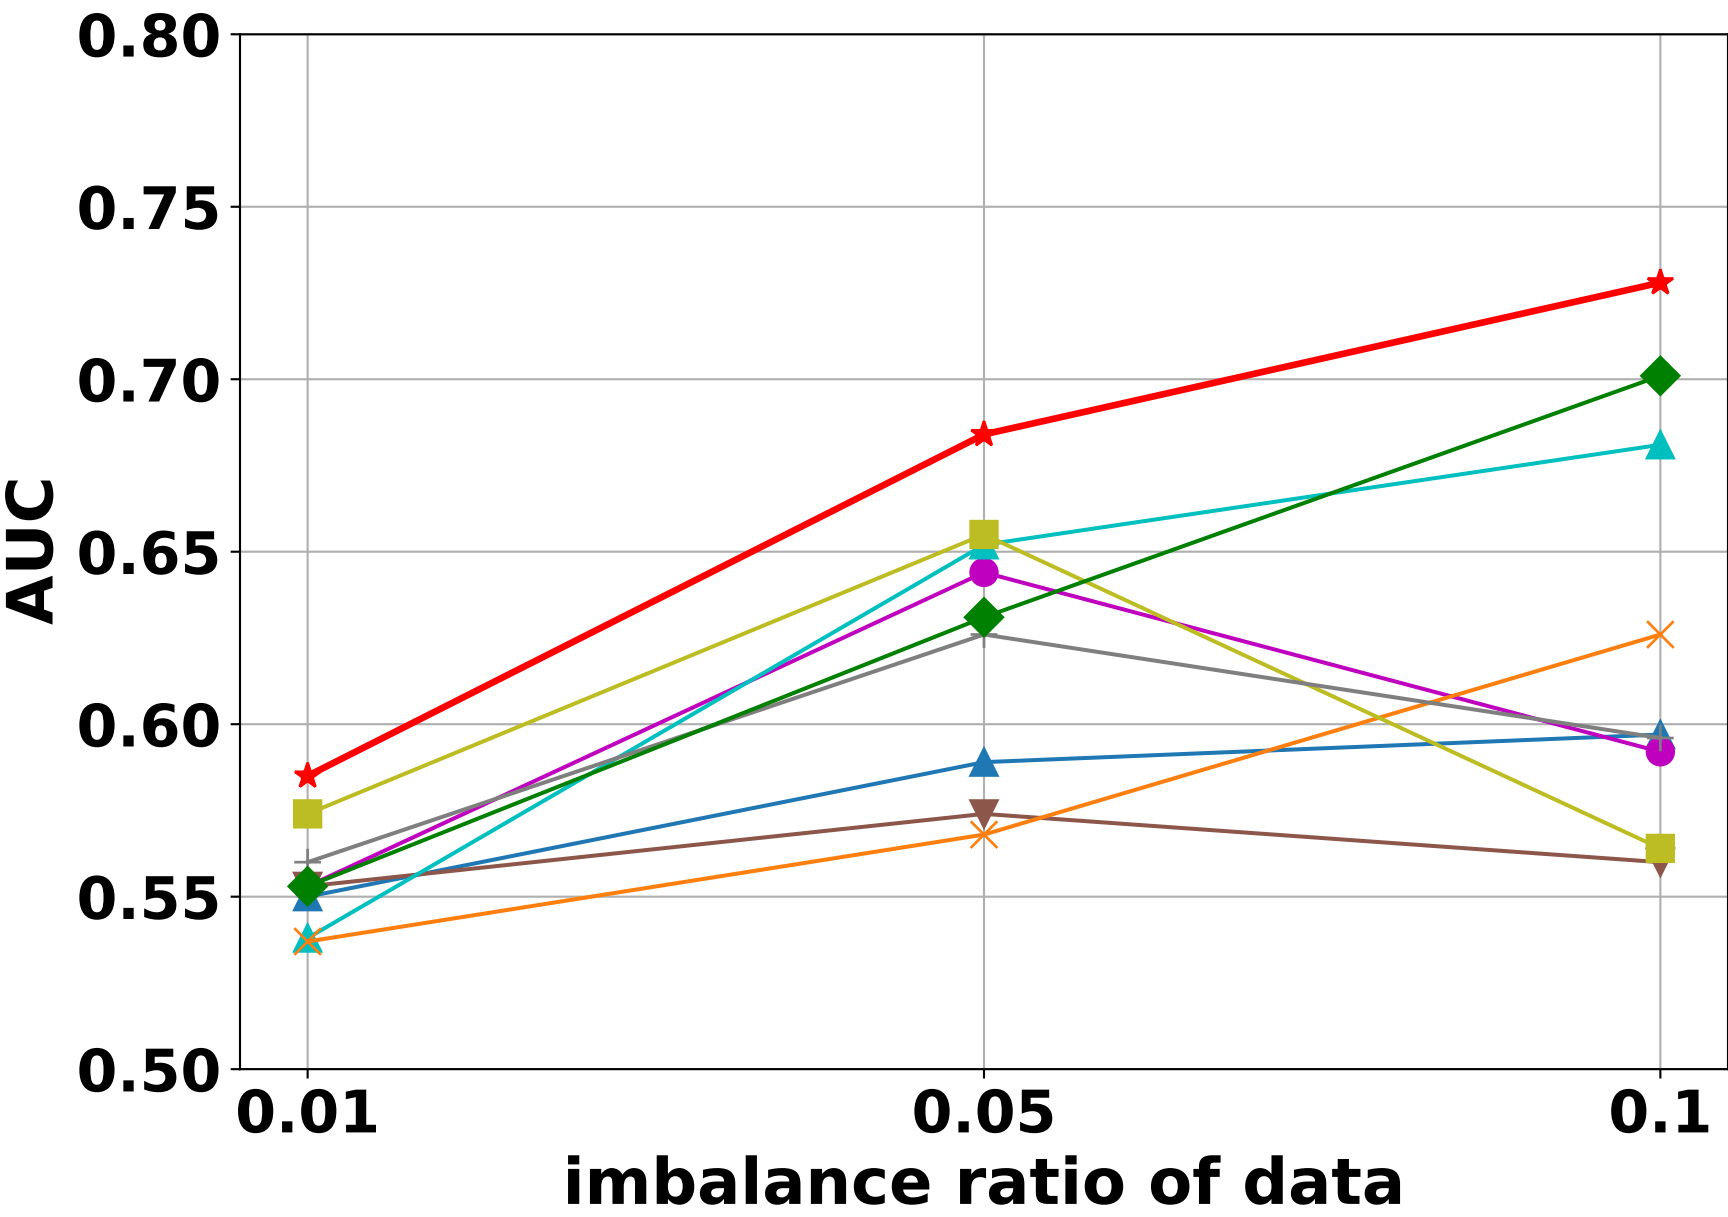

Supplement: supplementary_material [file attachment]

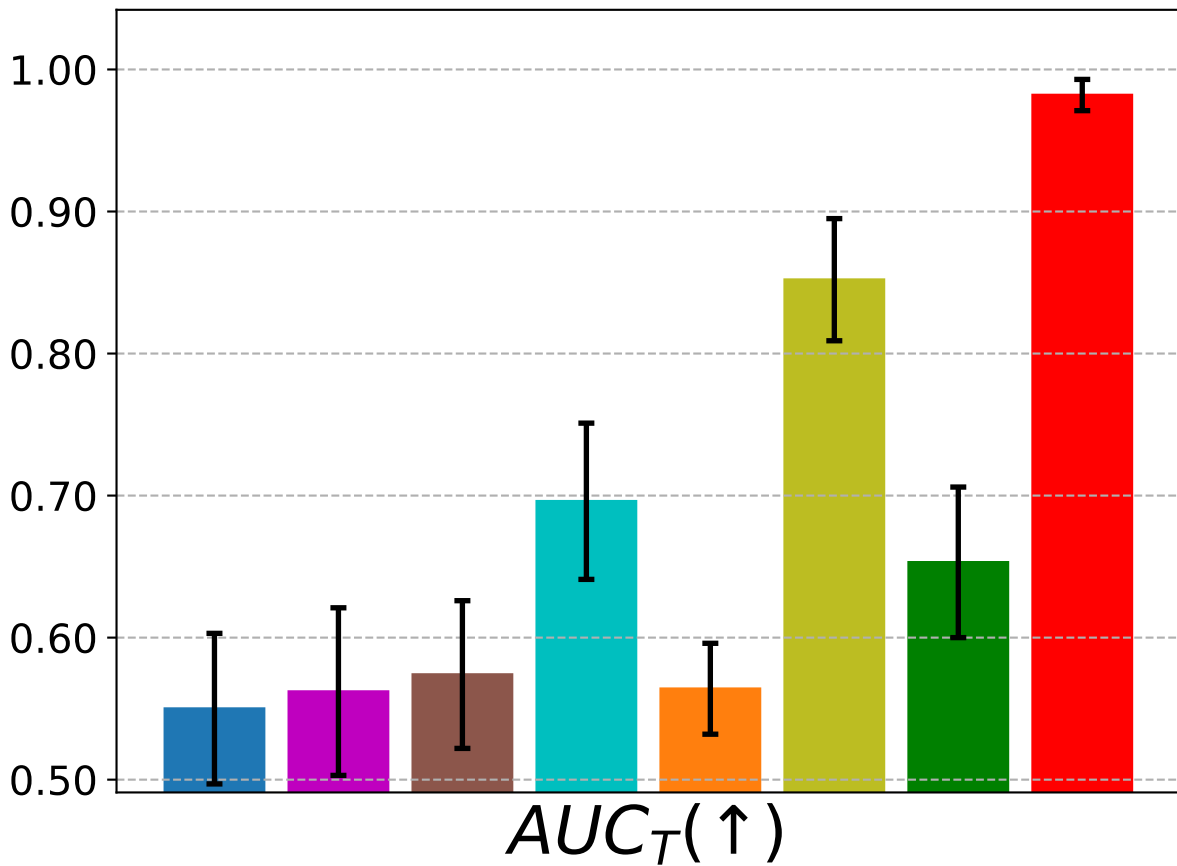

Supplement: supplementary_material [file attachment]

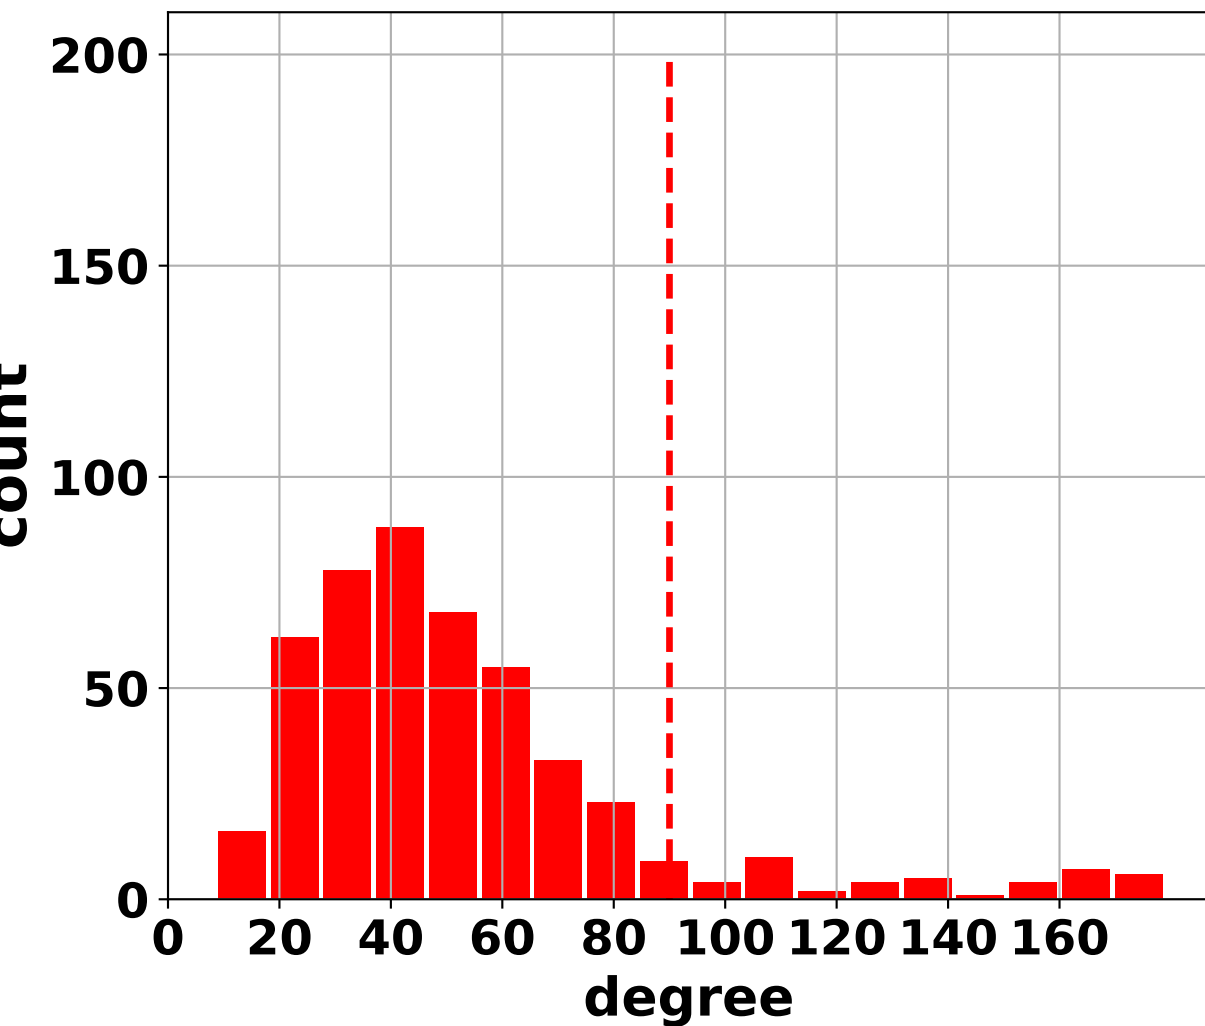

Supplement: supplementary_material [file attachment]

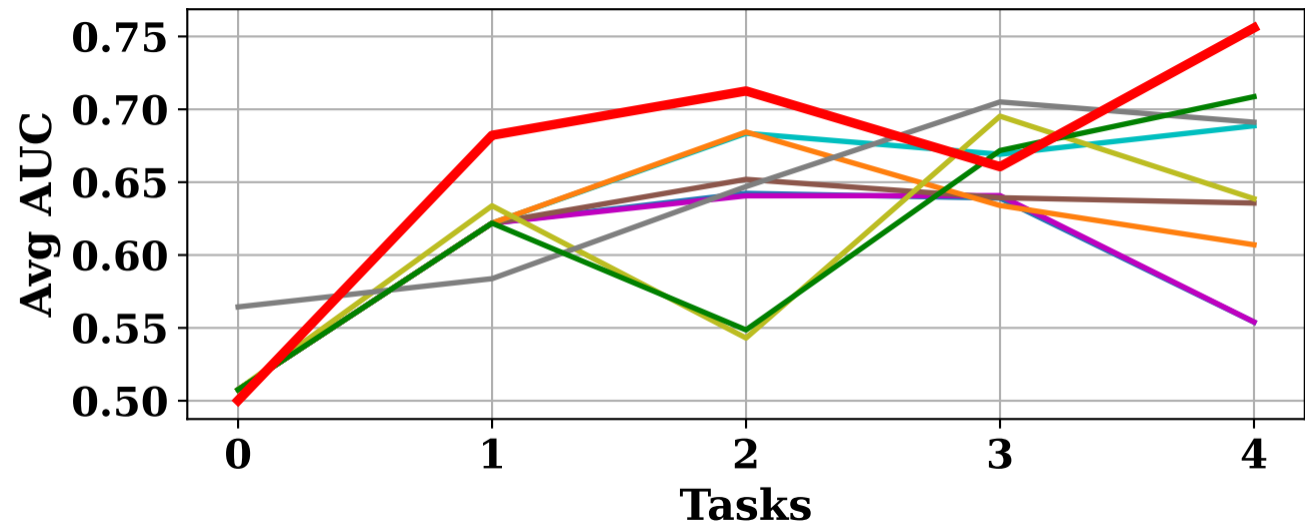

Supplement: supplementary_material [file attachment]

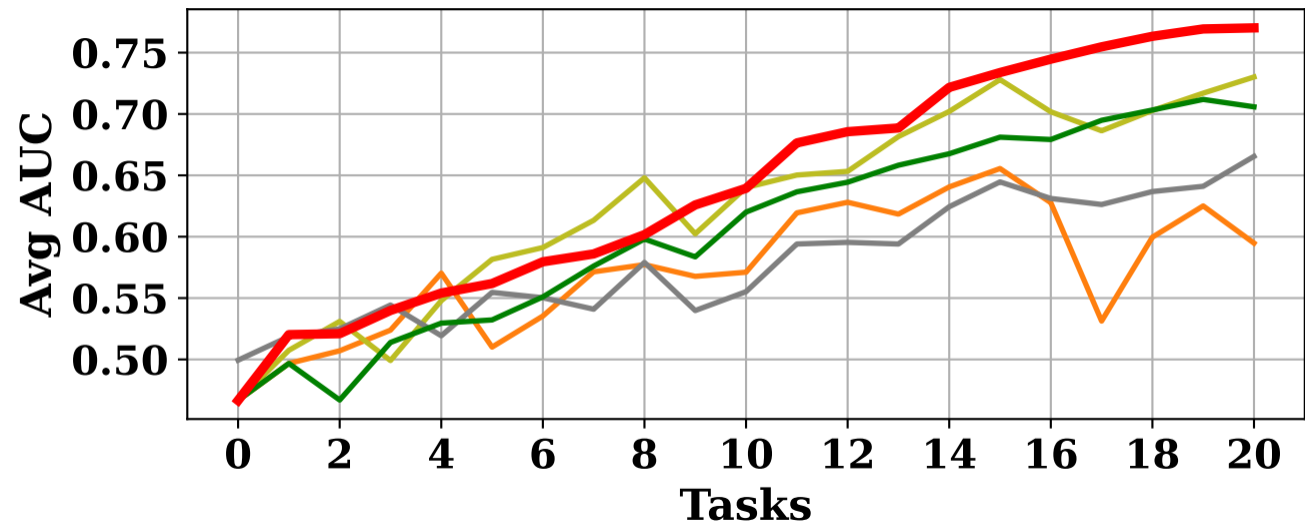

Supplement: supplementary_material [file attachment]

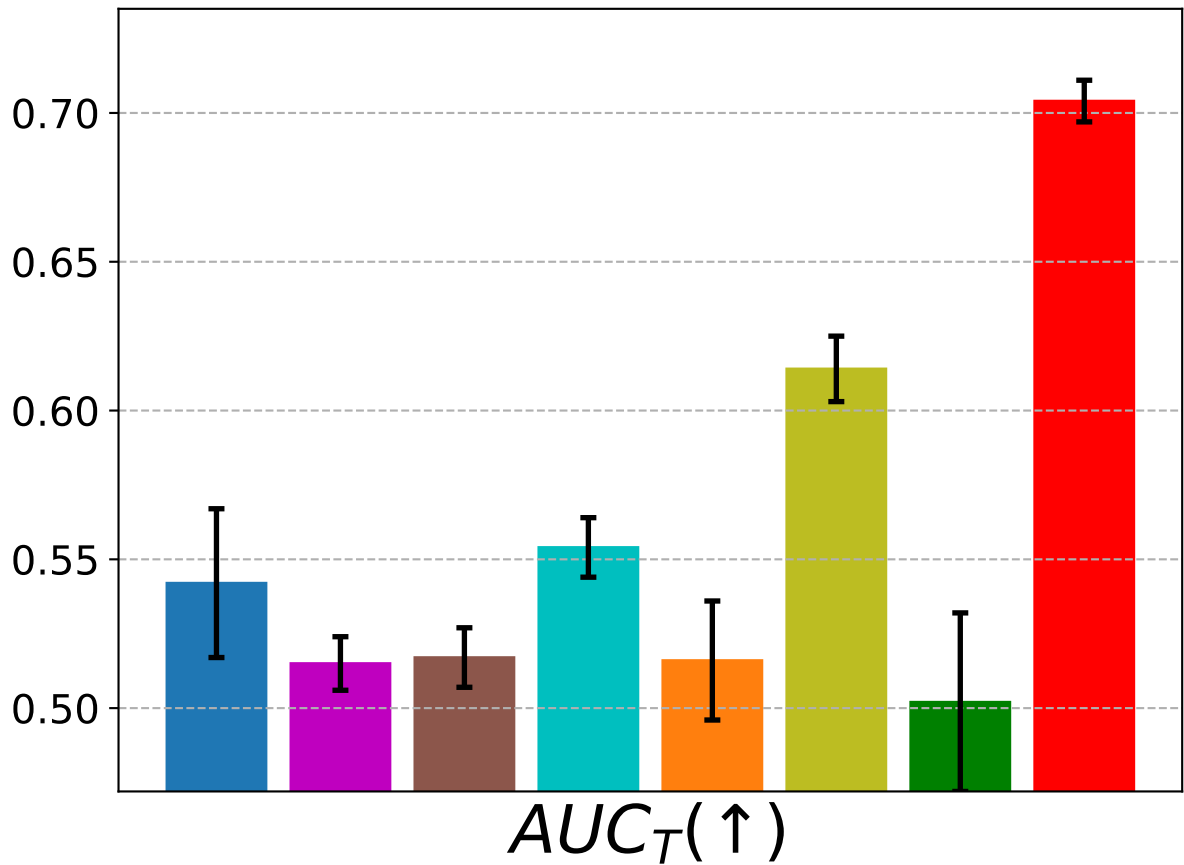

Supplement: supplementary_material [file attachment]

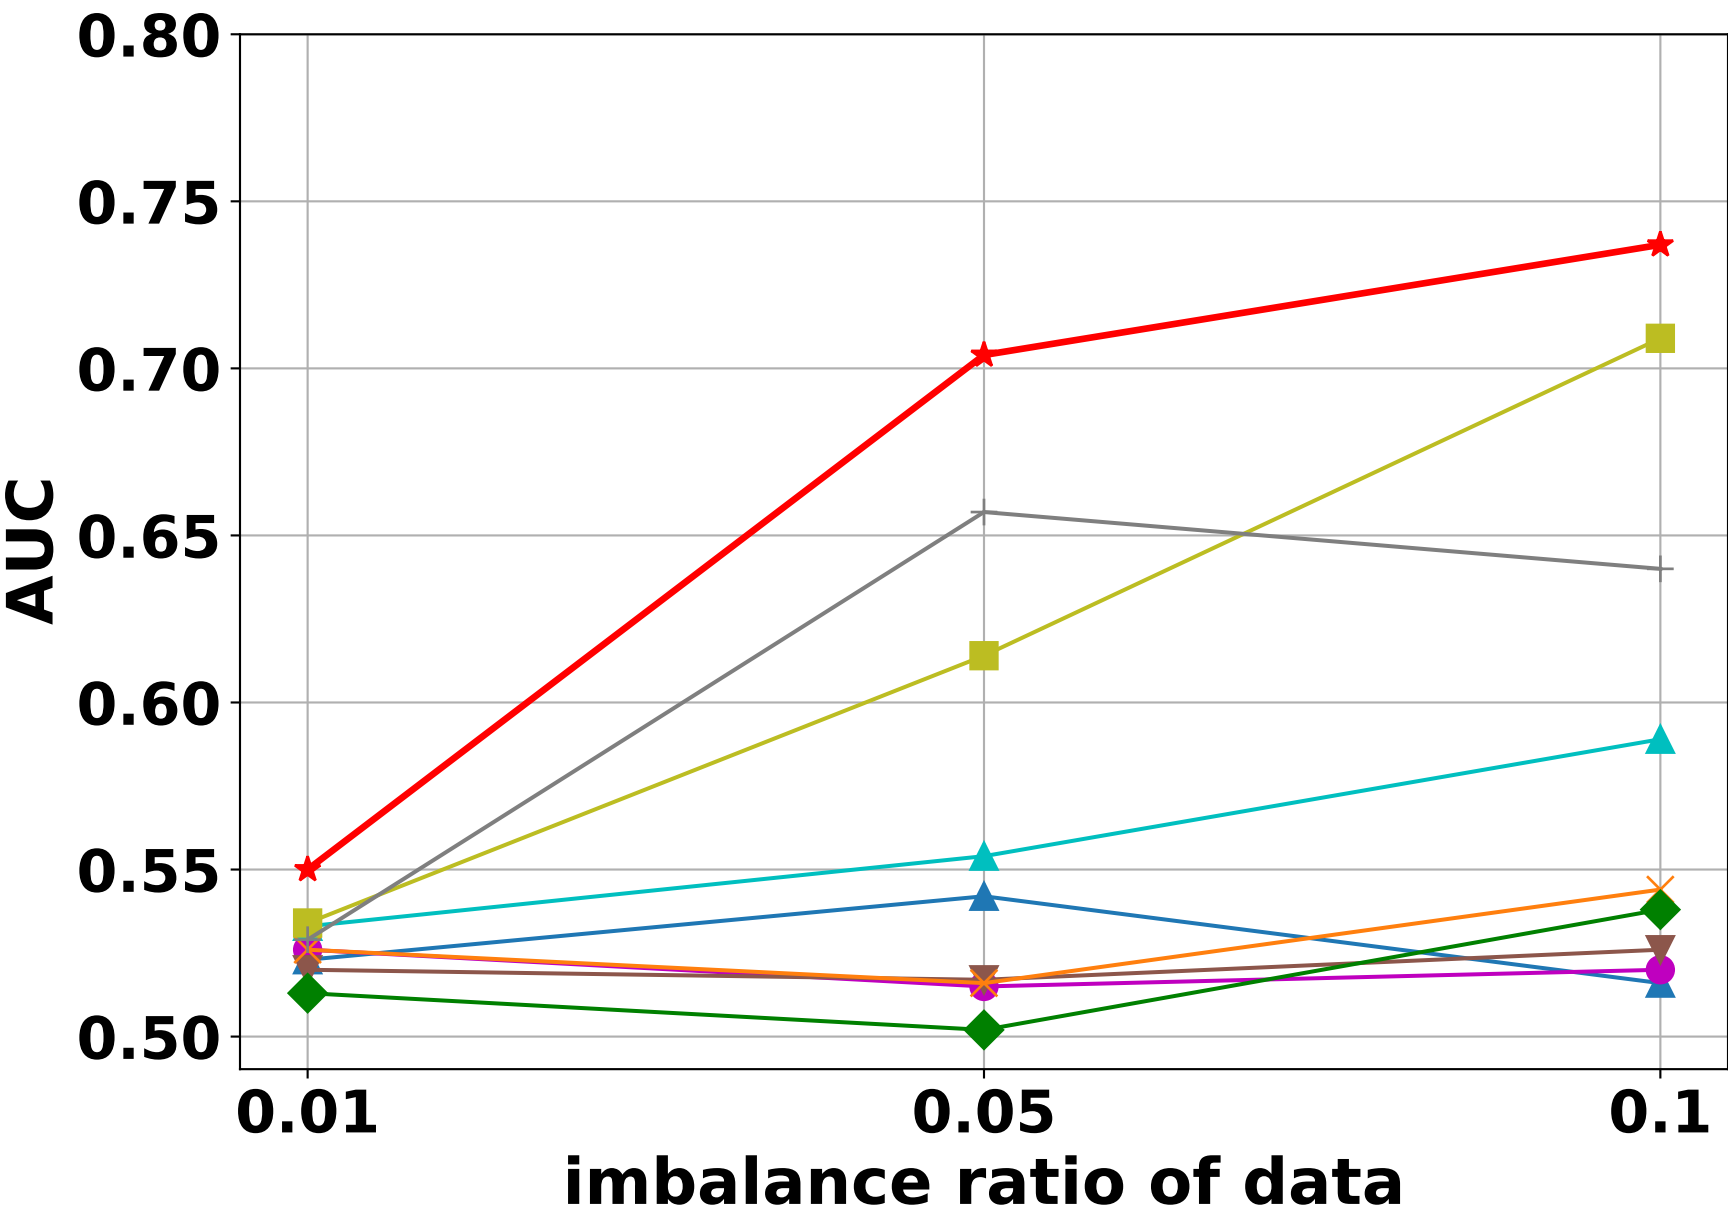

Supplement: supplementary_material [file attachment]

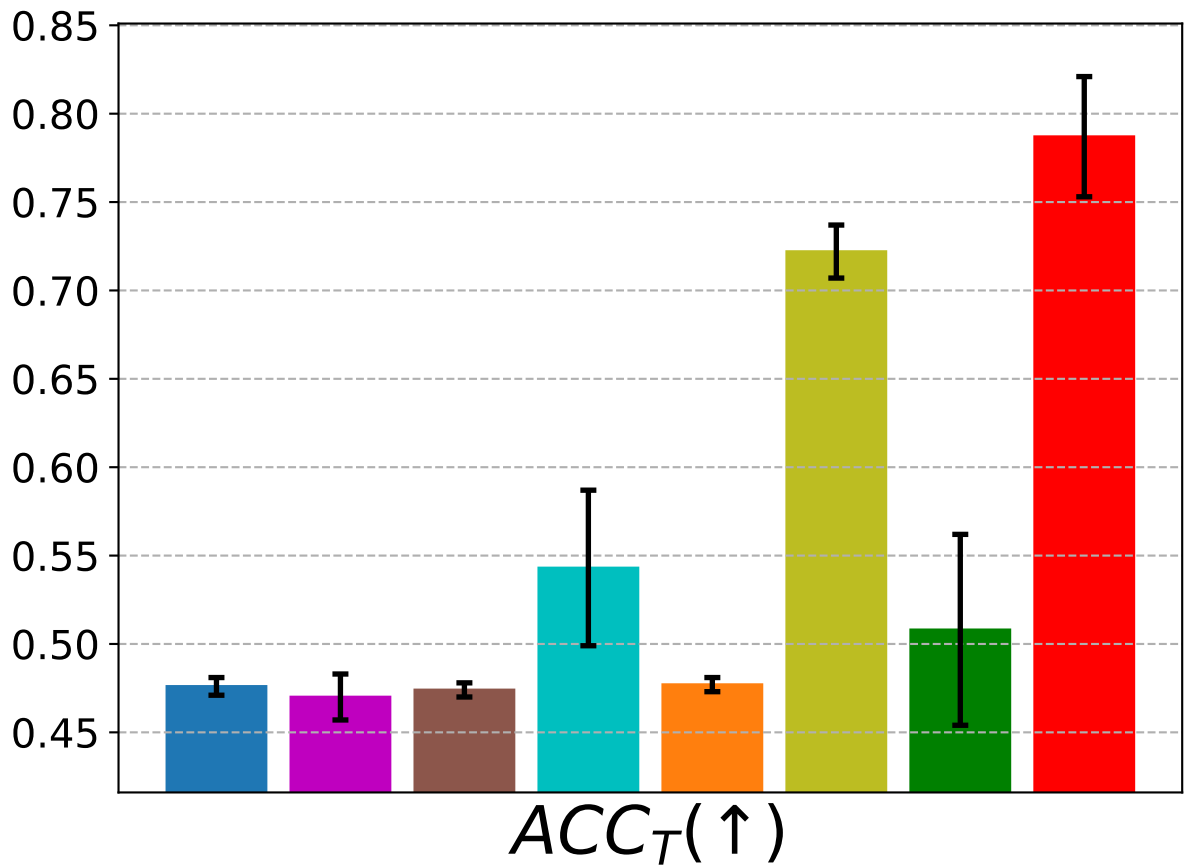

Supplement: supplementary_material [file attachment]

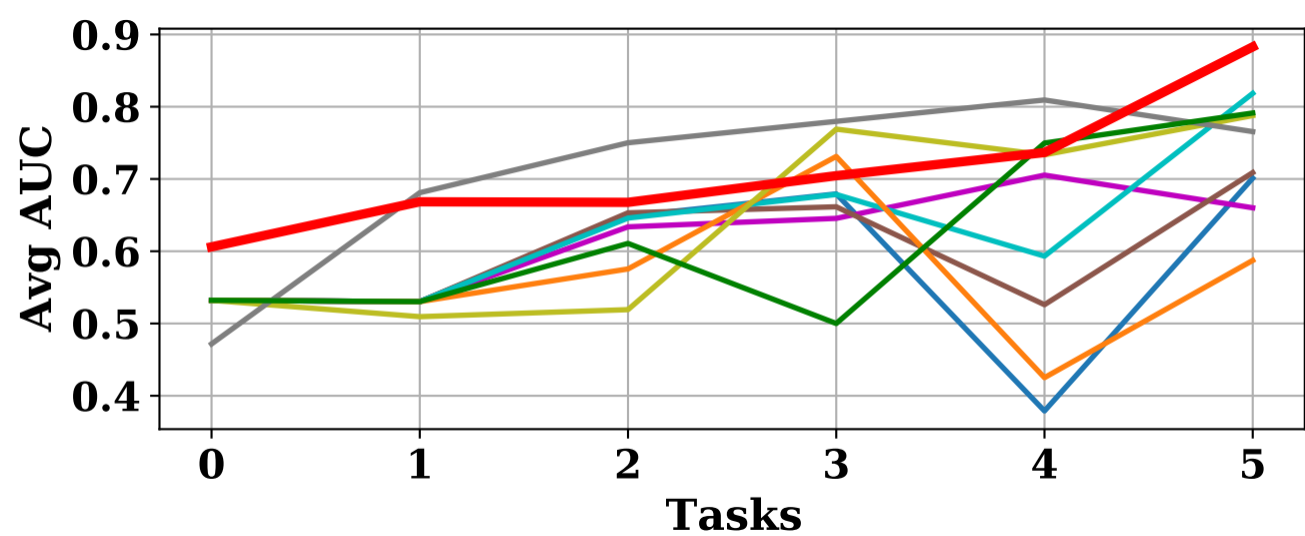

Supplement: supplementary_material [file attachment]

Balanced data

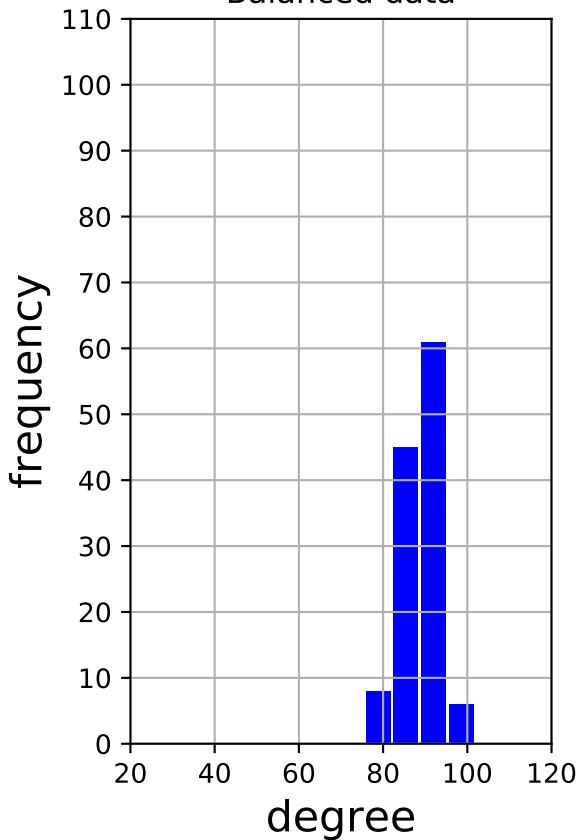

Imbalanced data

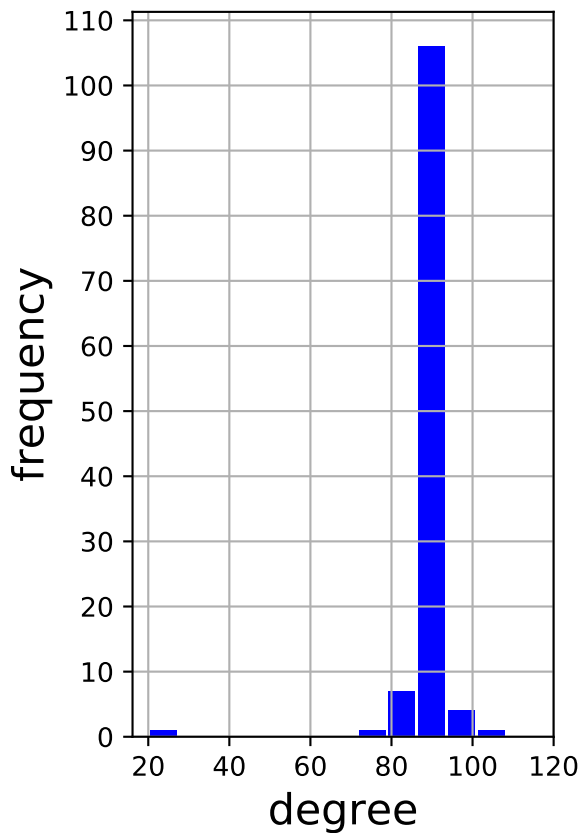

Supplement: supplementary_material [file attachment]

### Balanced data

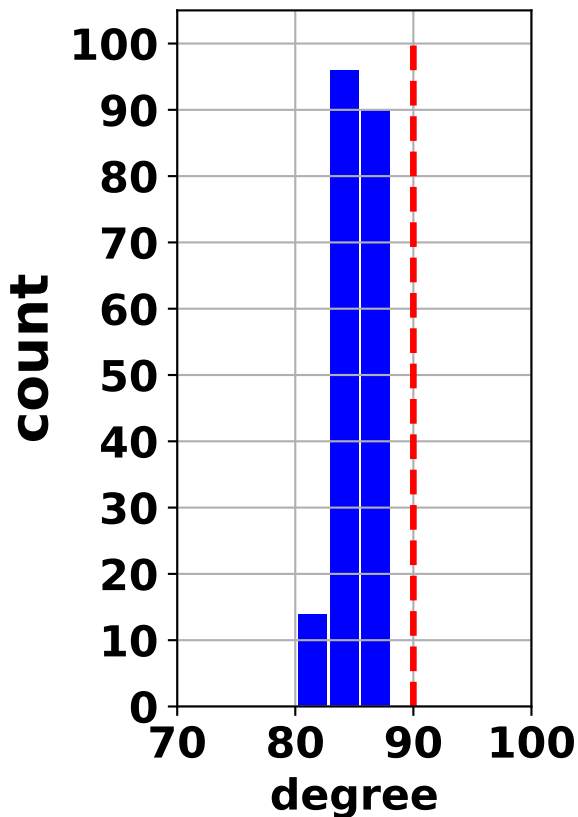

### Imbalanced data

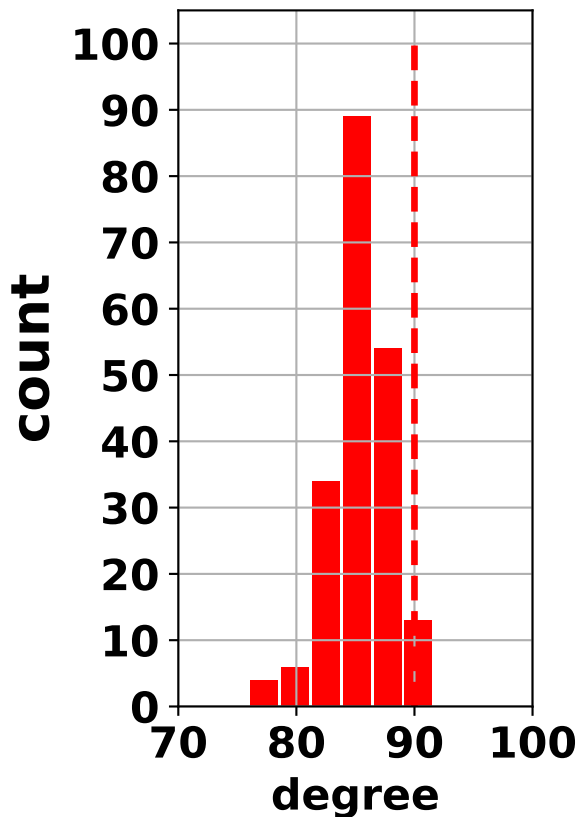

Supplement: supplementary_material [file attachment]

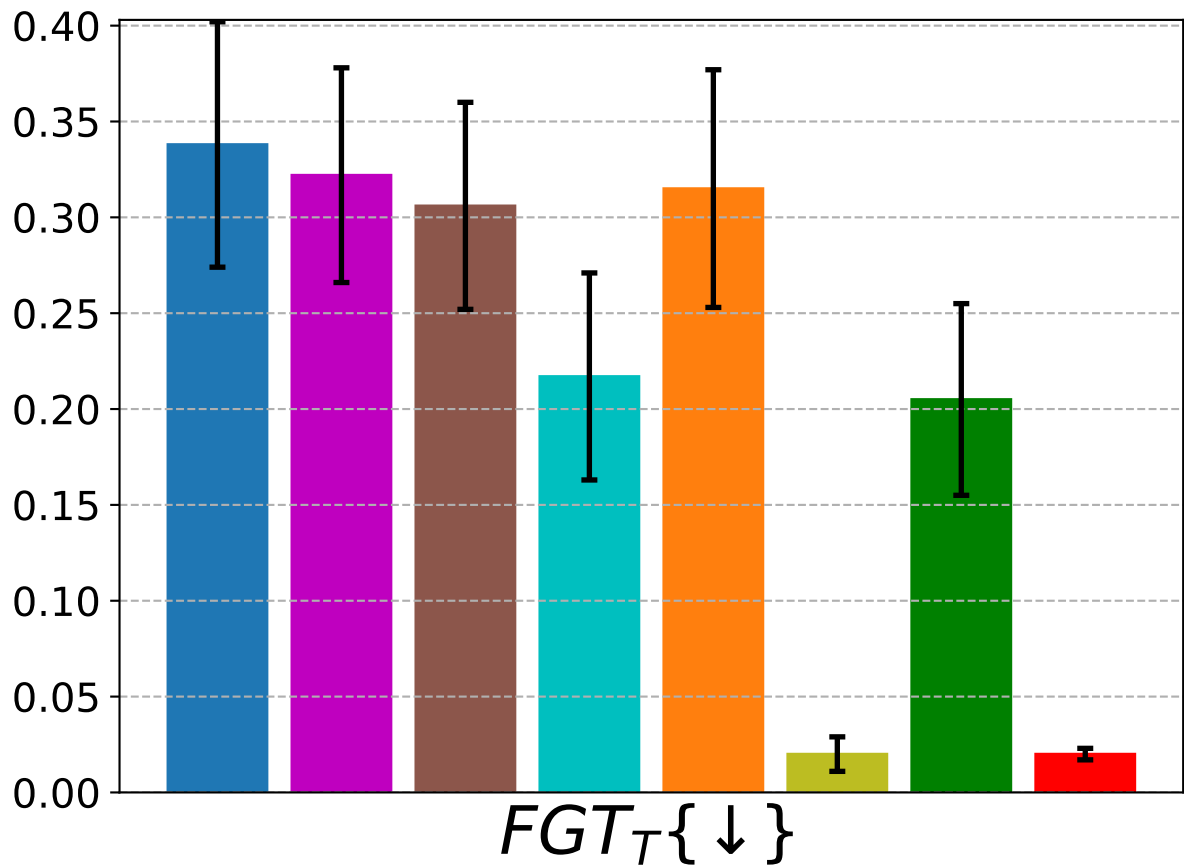

Supplement: supplementary_material [file attachment]

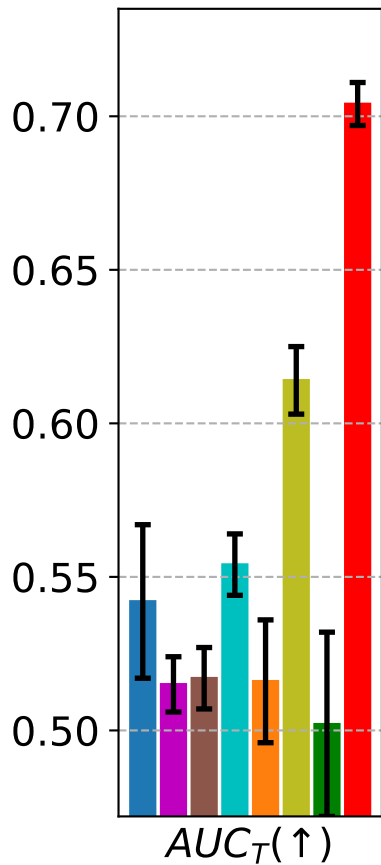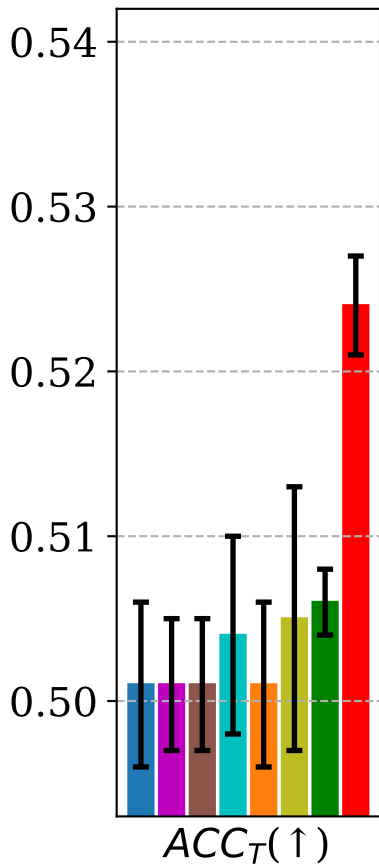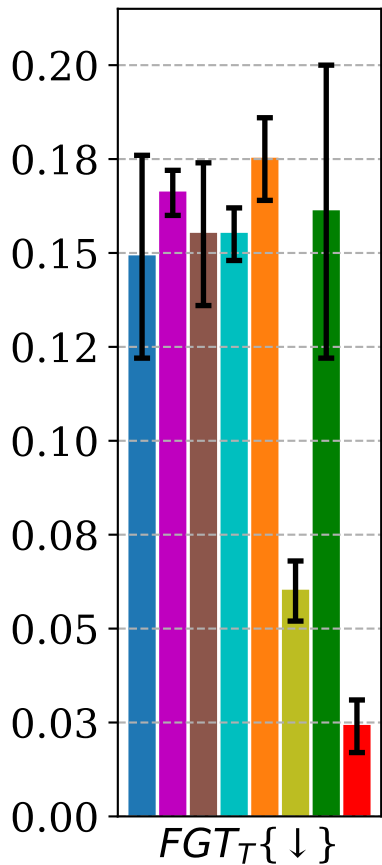

Supplement: supplementary_material [file attachment]

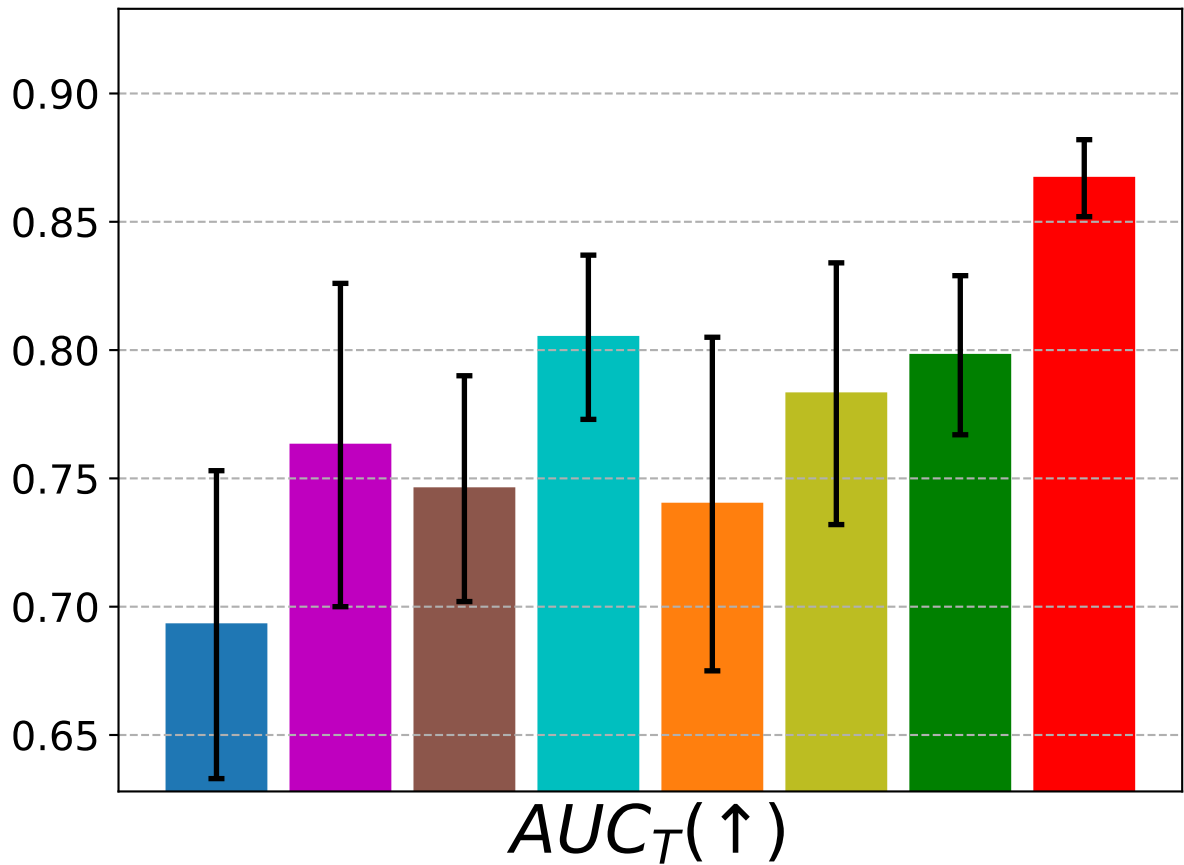

Supplement: supplementary_material [file attachment]

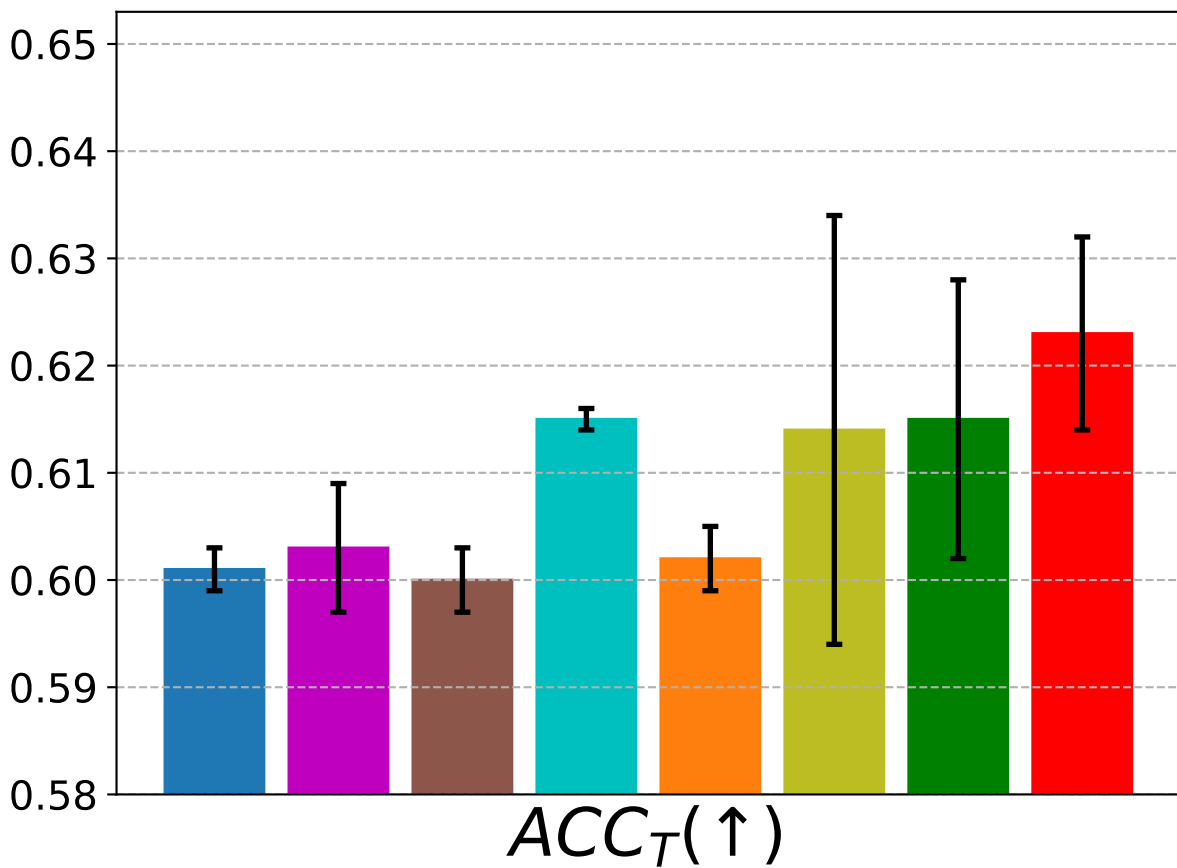

Supplement: supplementary_material [file attachment]

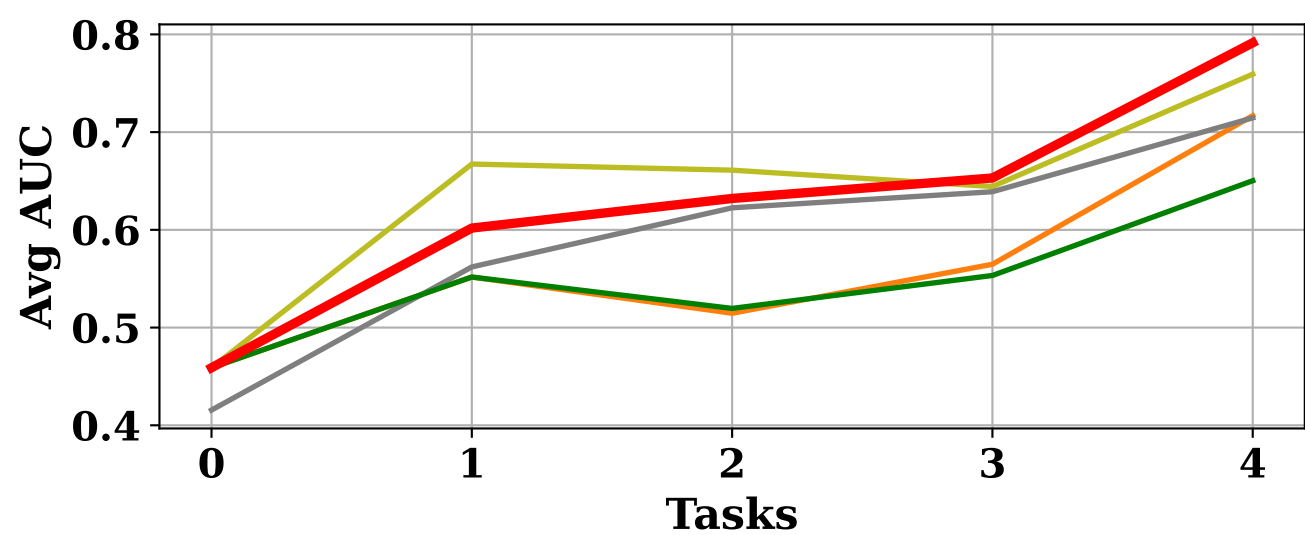

Supplement: supplementary_material [file attachment]

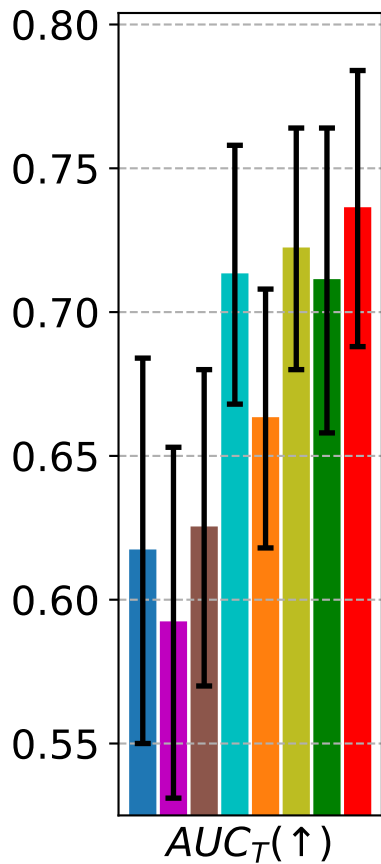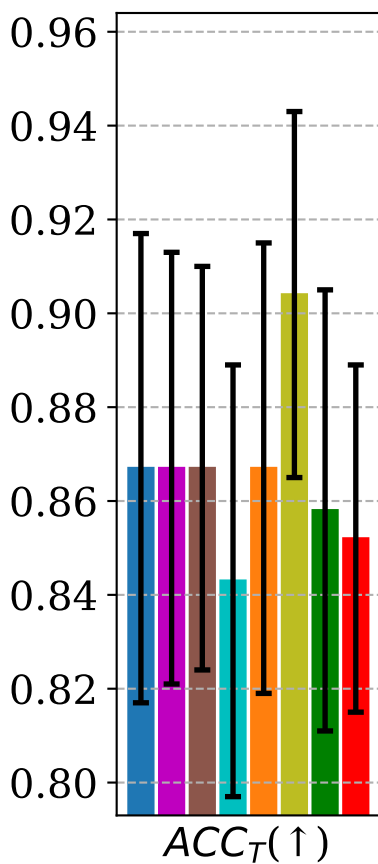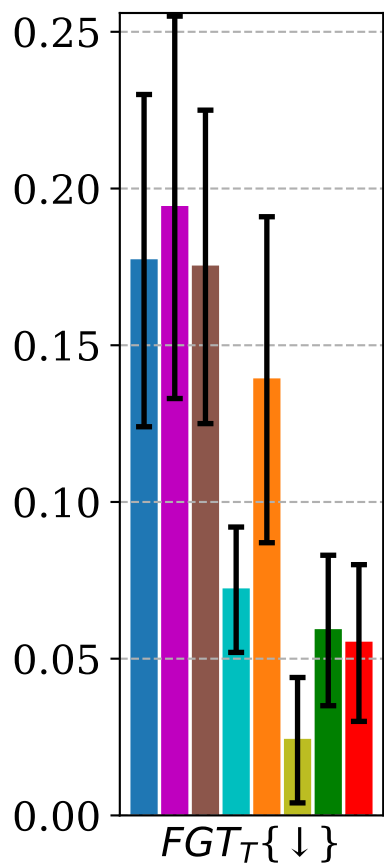

Supplement: supplementary_material [file attachment]

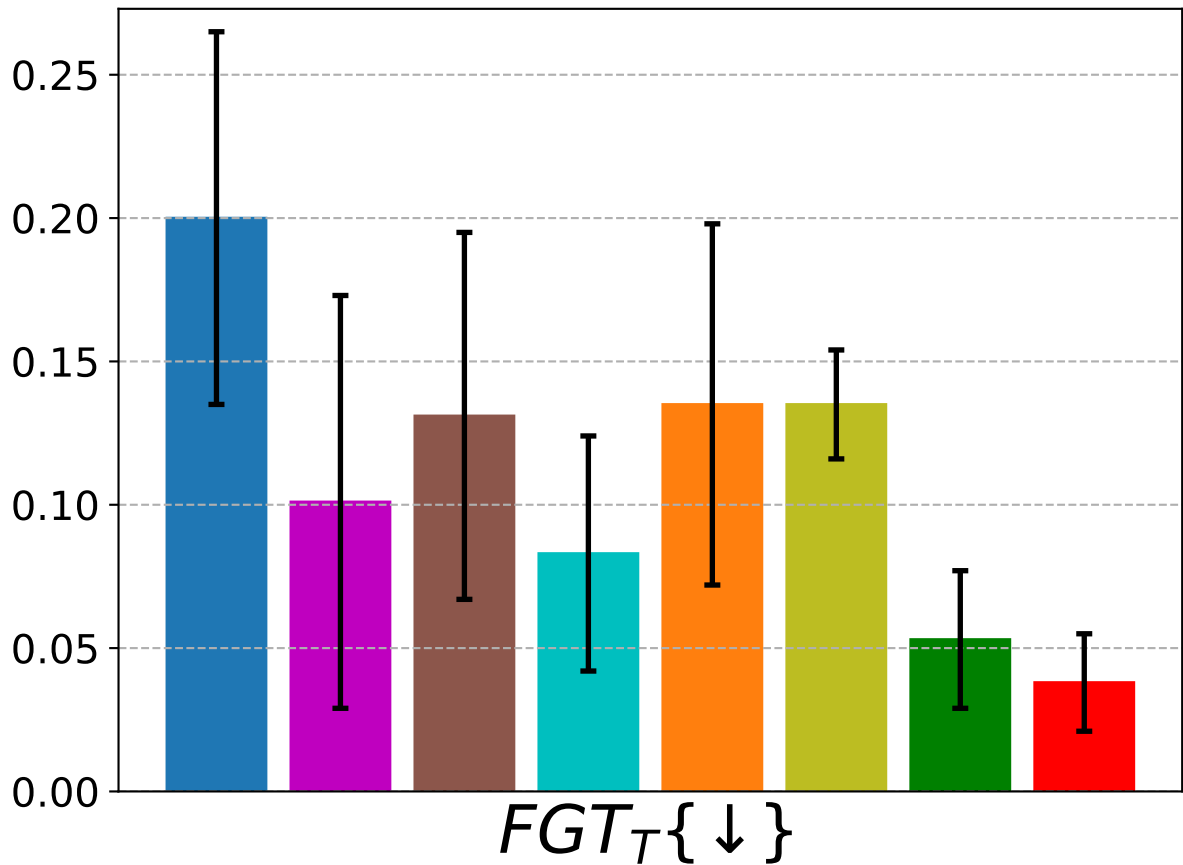

Supplement: supplementary_material [file attachment]

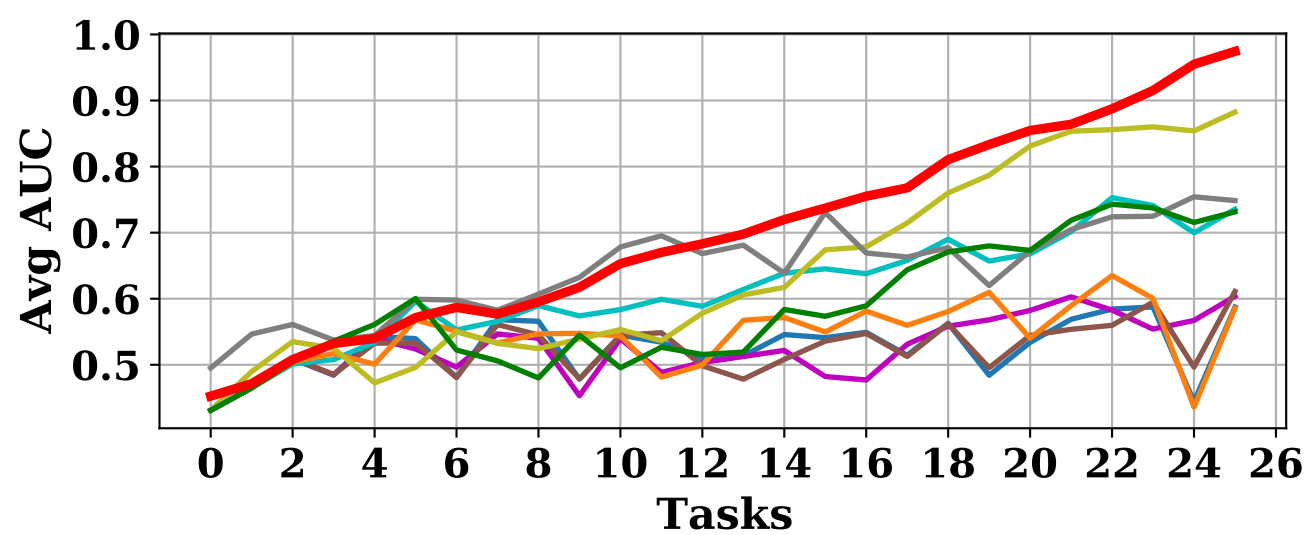

Supplement: supplementary_material [file attachment]

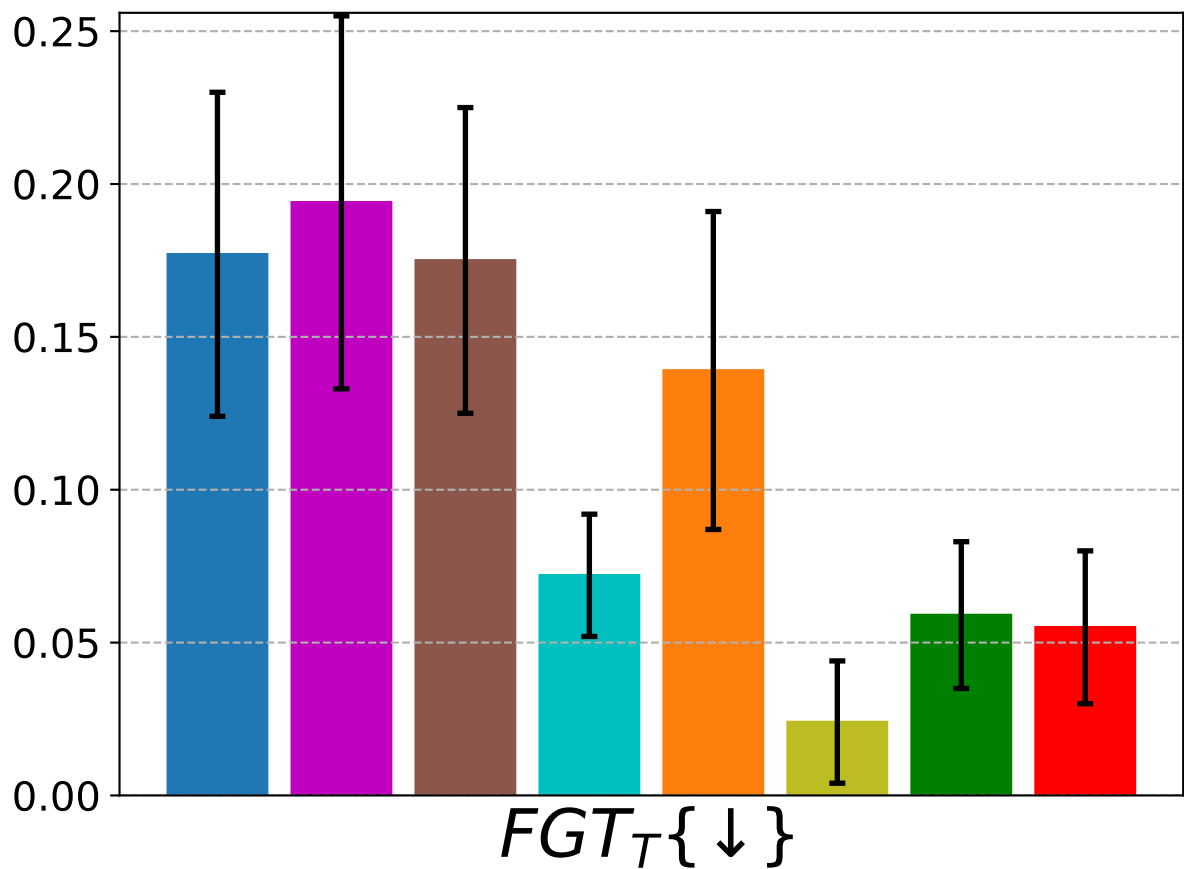

Supplement: supplementary_material [file attachment]

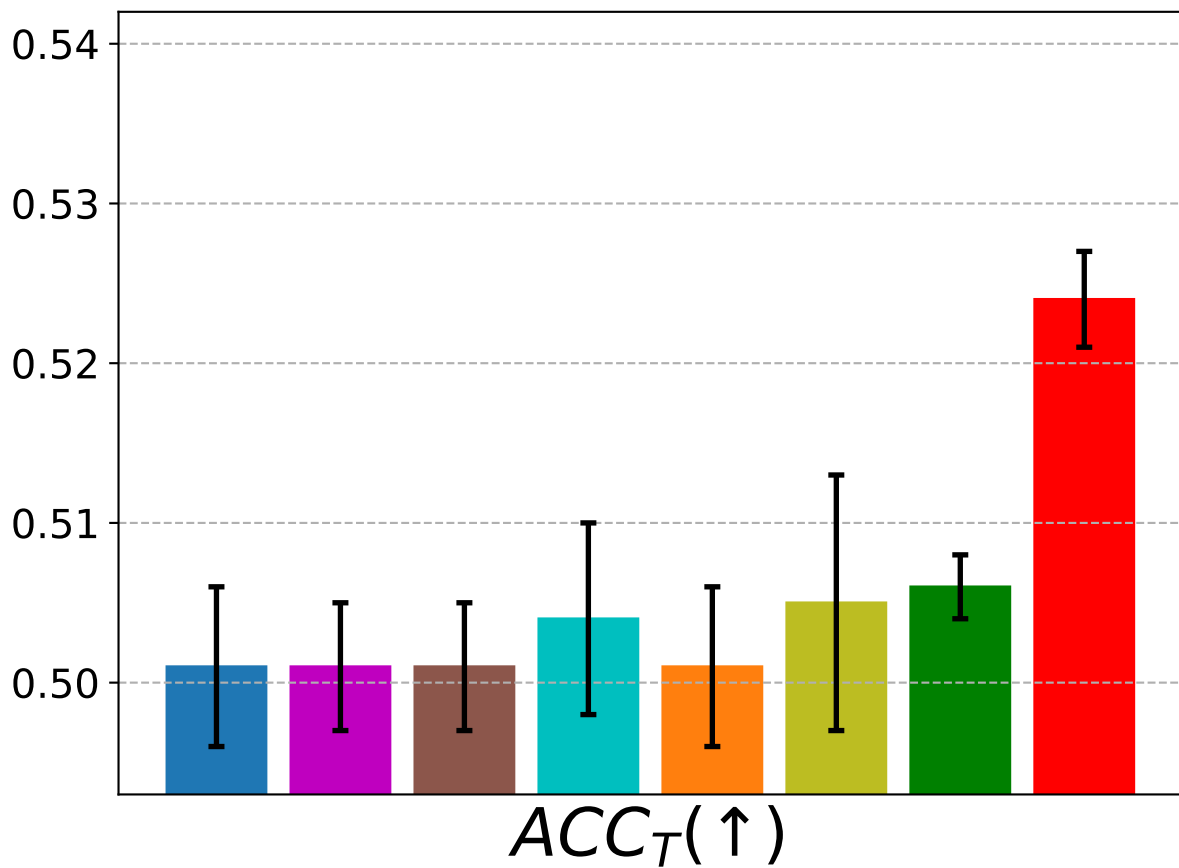

Supplement: supplementary_material [file attachment]

Distributions of the angles between  $g_{ref}$  and  $g_{cur}$

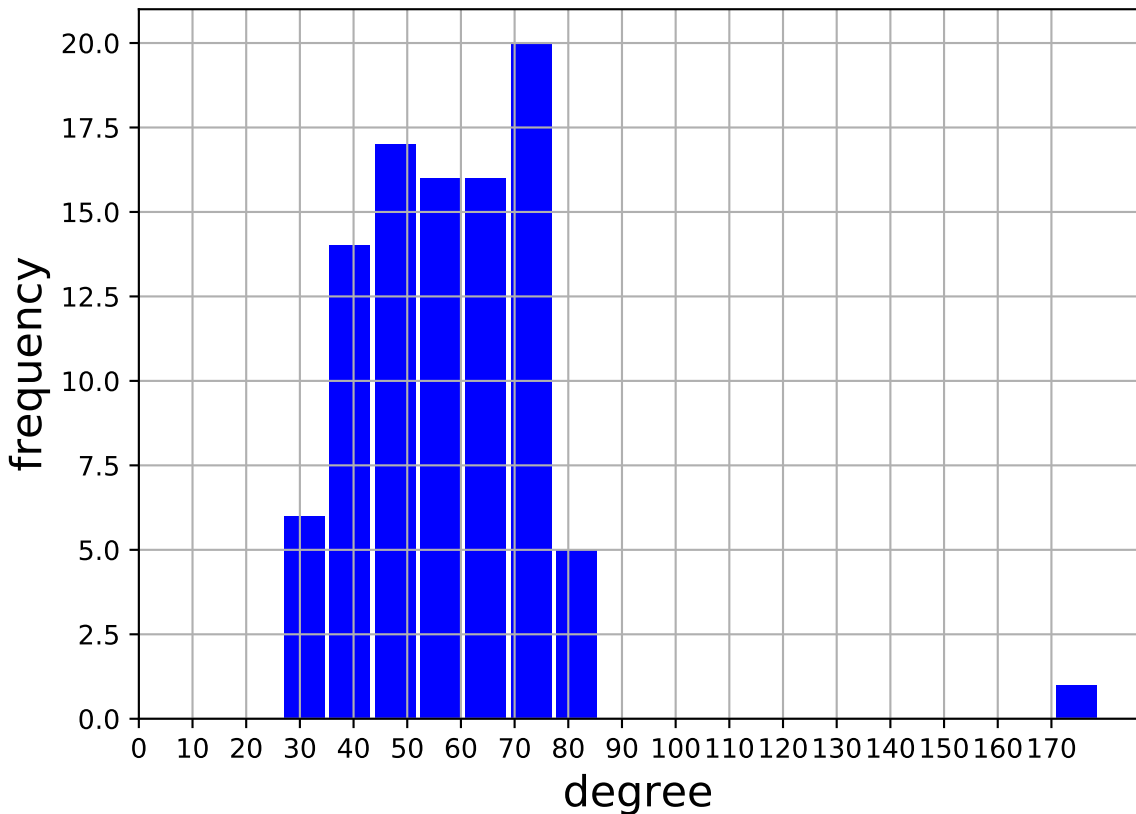

Supplement: supplementary_material [file attachment]

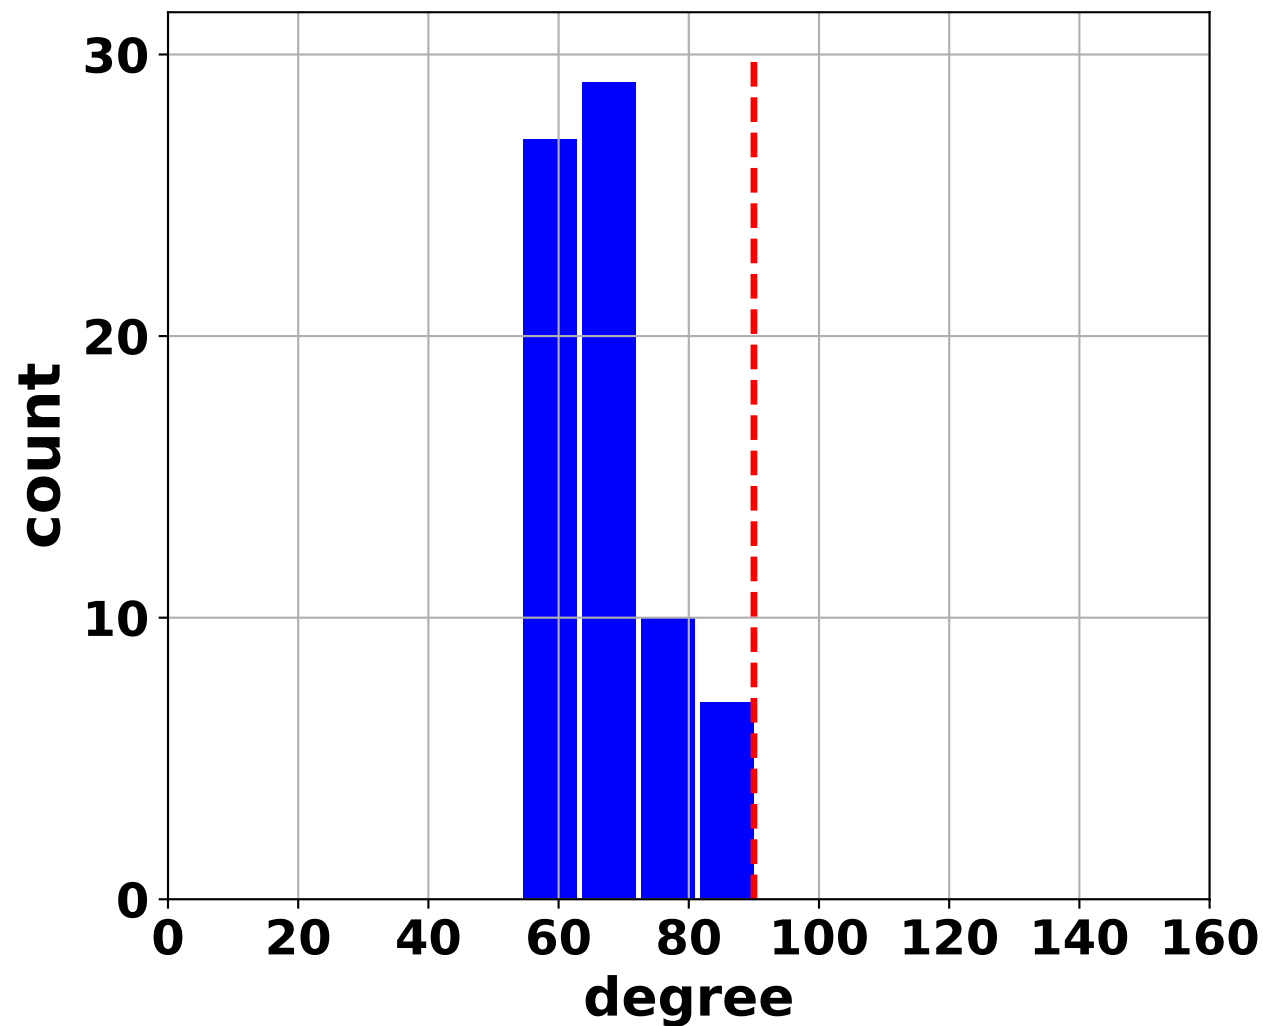

Supplement: supplementary_material [file attachment]

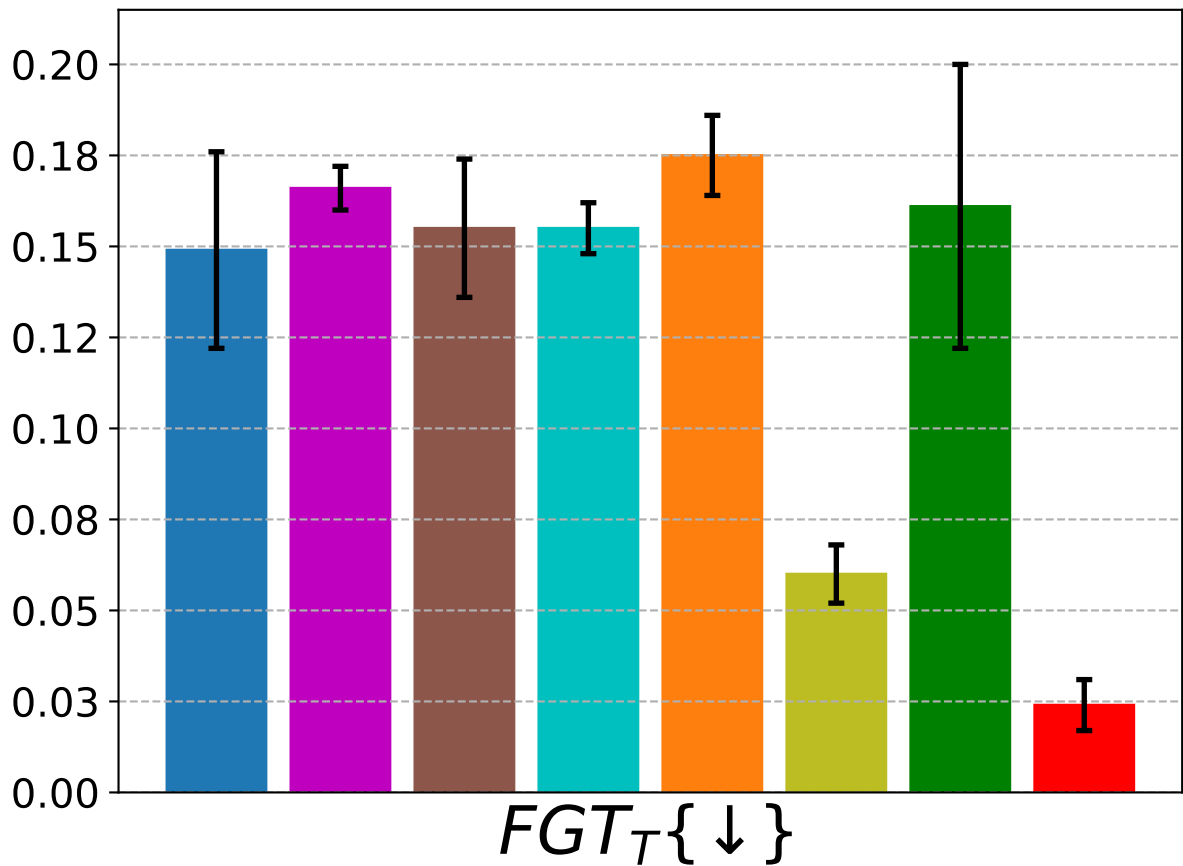

Supplement: supplementary_material [file attachment]

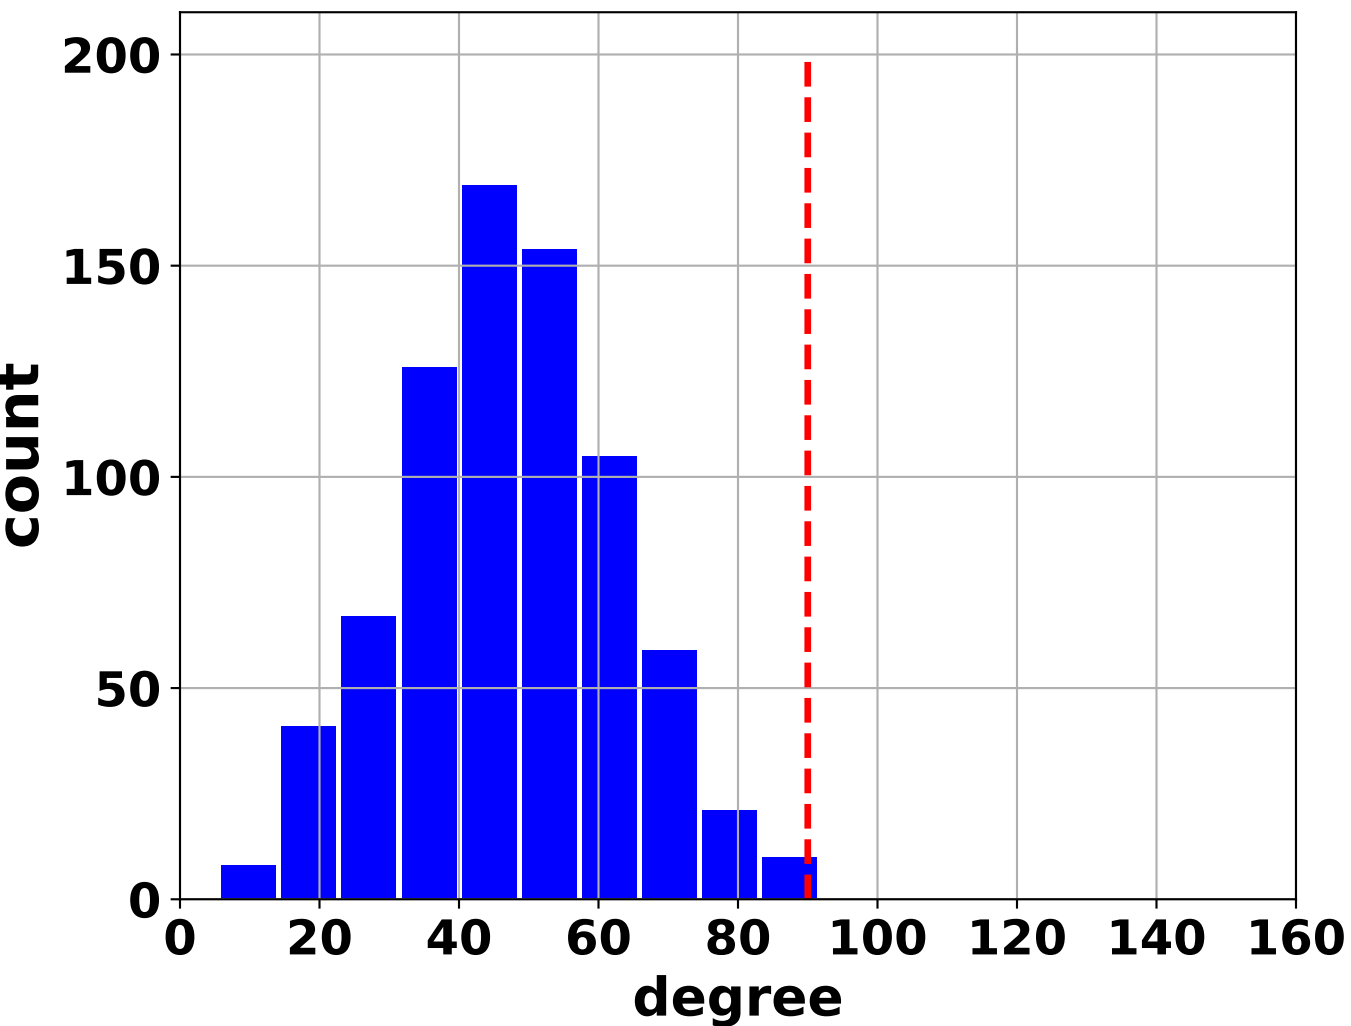

Supplement: supplementary_material [file attachment]

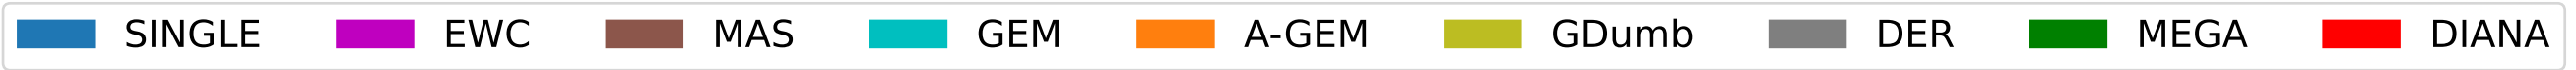

Supplement: supplementary_material [file attachment]

Avg AUC

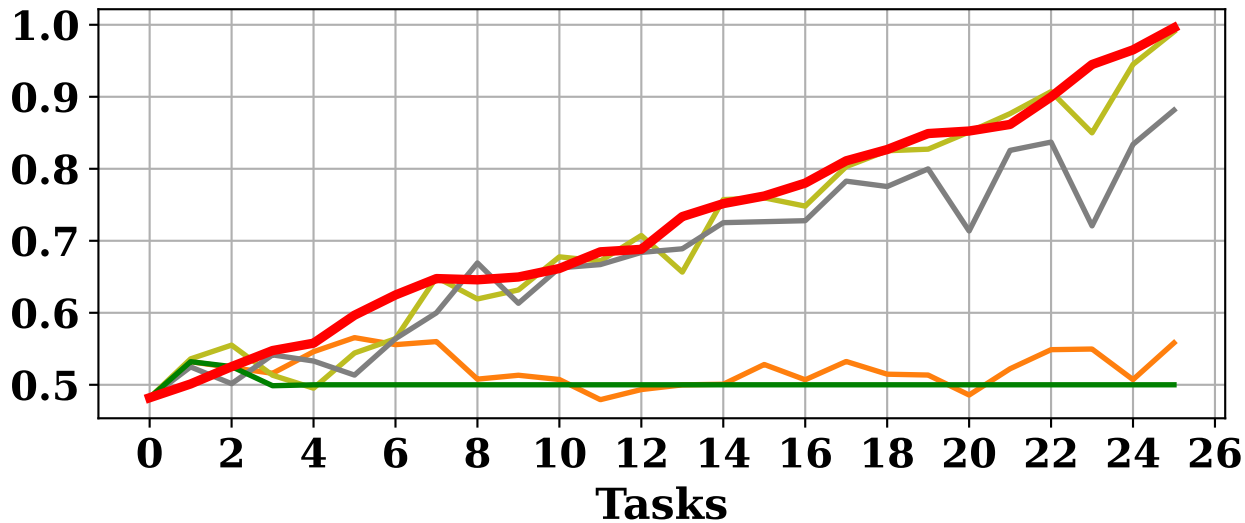

Supplement: supplementary_material [file attachment]

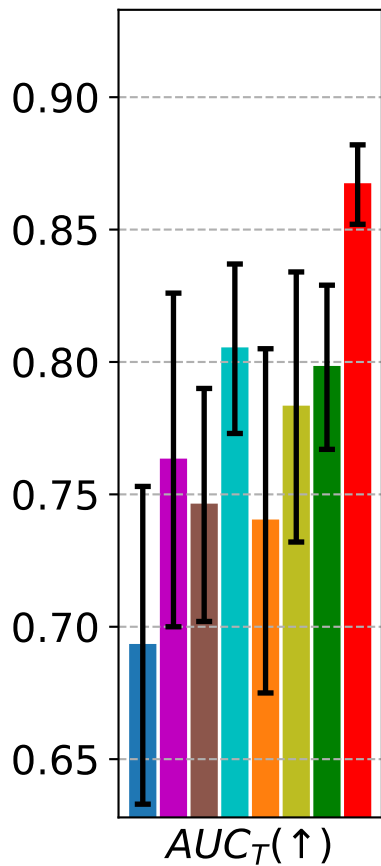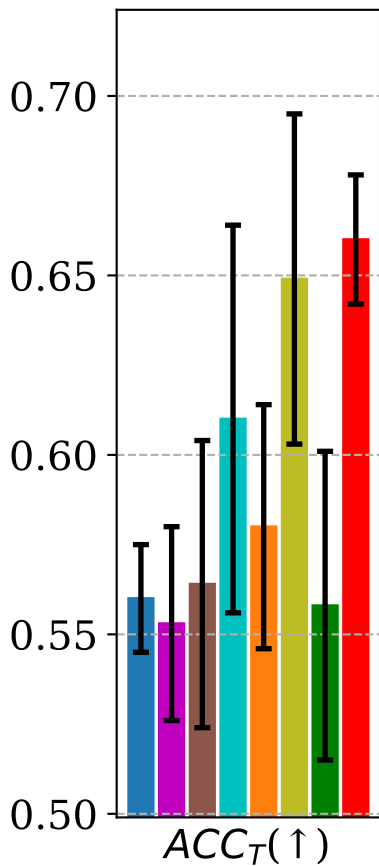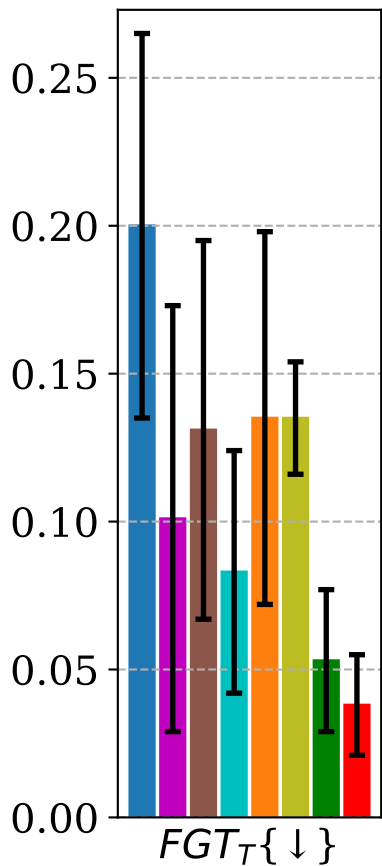

Supplement: supplementary_material [file attachment]

### Balanced data

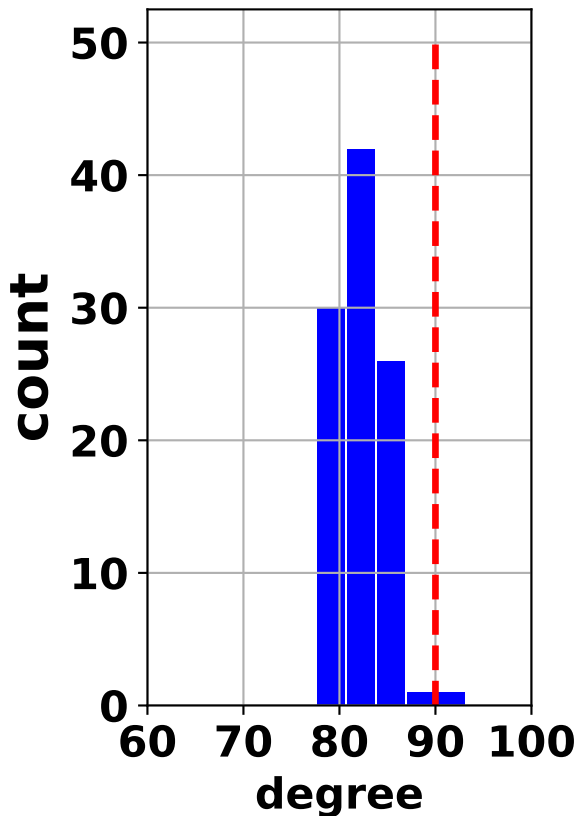

### Imbalanced data

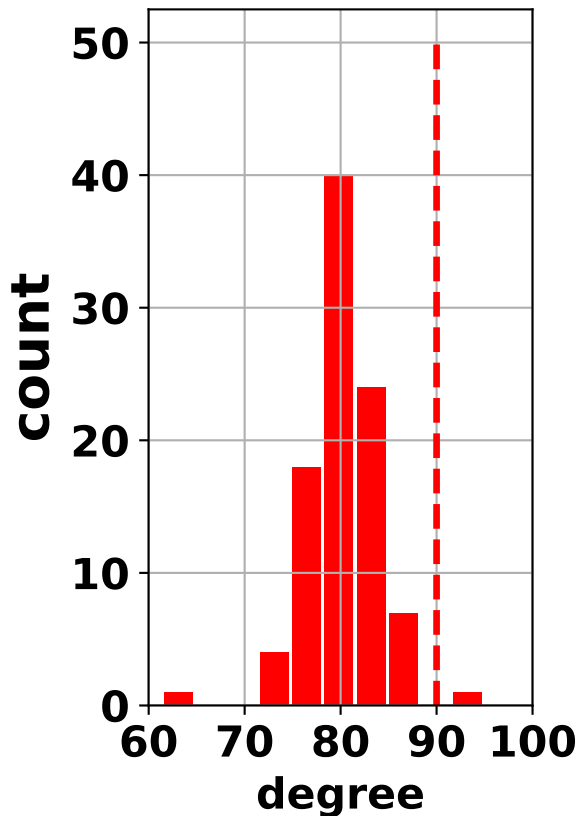

Supplement: supplementary_material [file attachment]

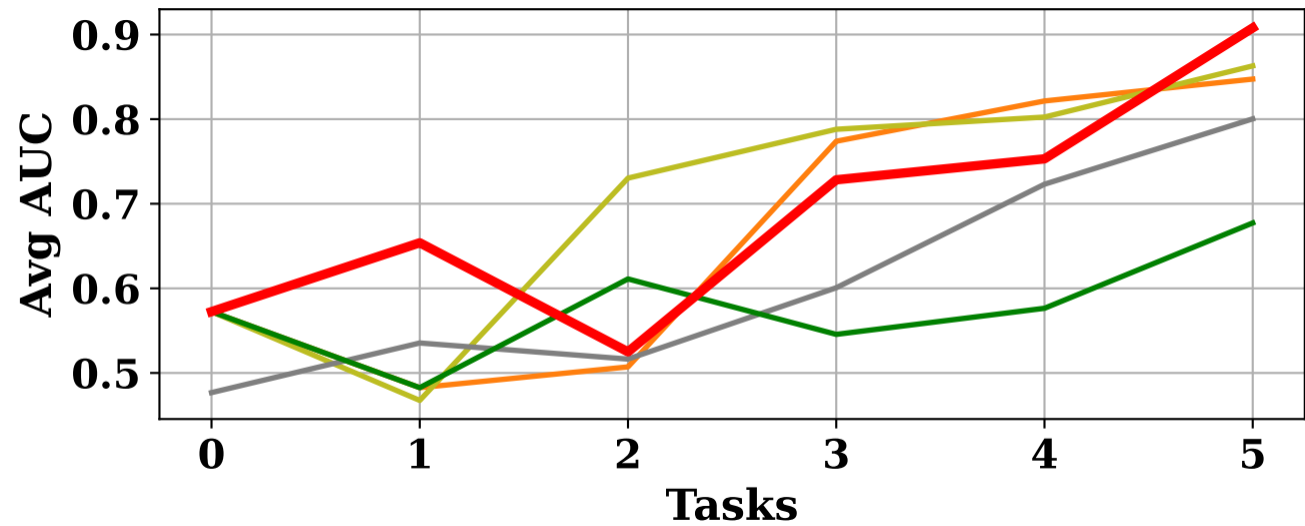

Supplement: supplementary_material [file attachment]

Avg AUC

0.70  
0.65  
0.60  
0.55  
0.50

0 2 4 6 8 10 12 14 16 18 20

Tasks

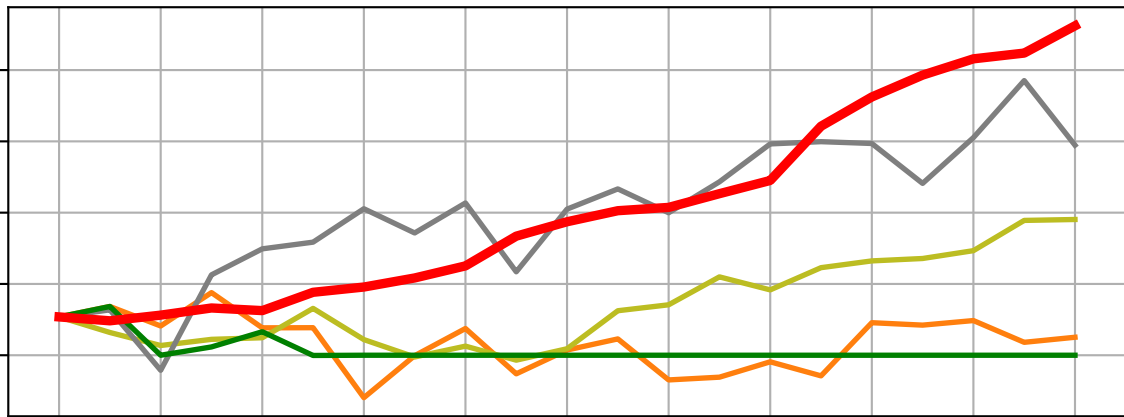

Supplement: supplementary_material [file attachment]

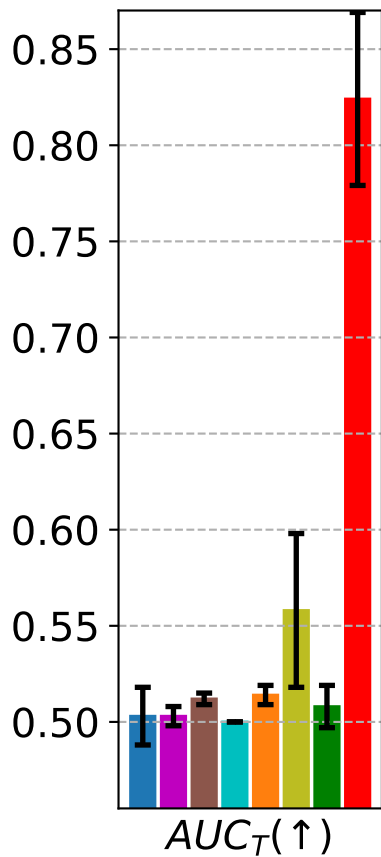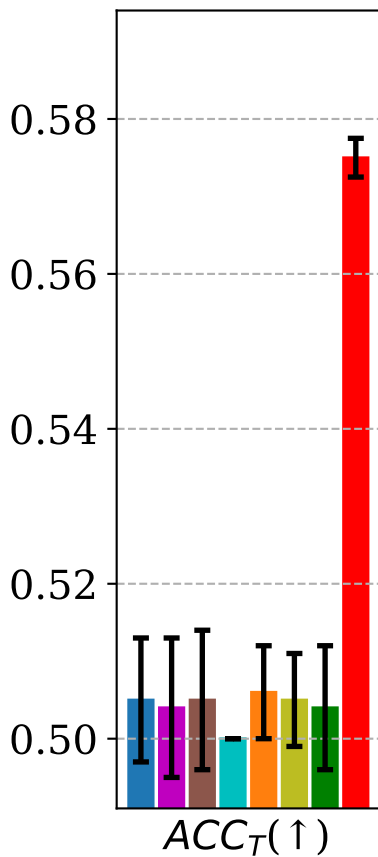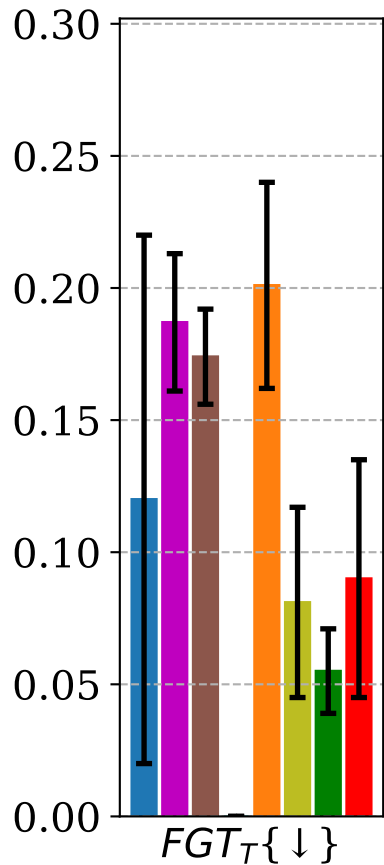

Supplement: supplementary_material [file attachment]

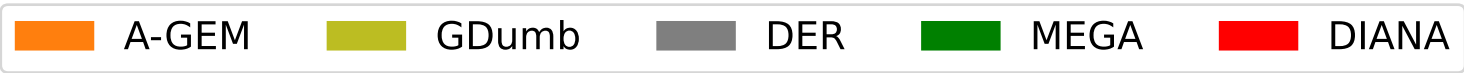

Supplement: supplementary_material [file attachment]

Distributions of the angles between  $g_{ref}$  and  $g_{cur}$

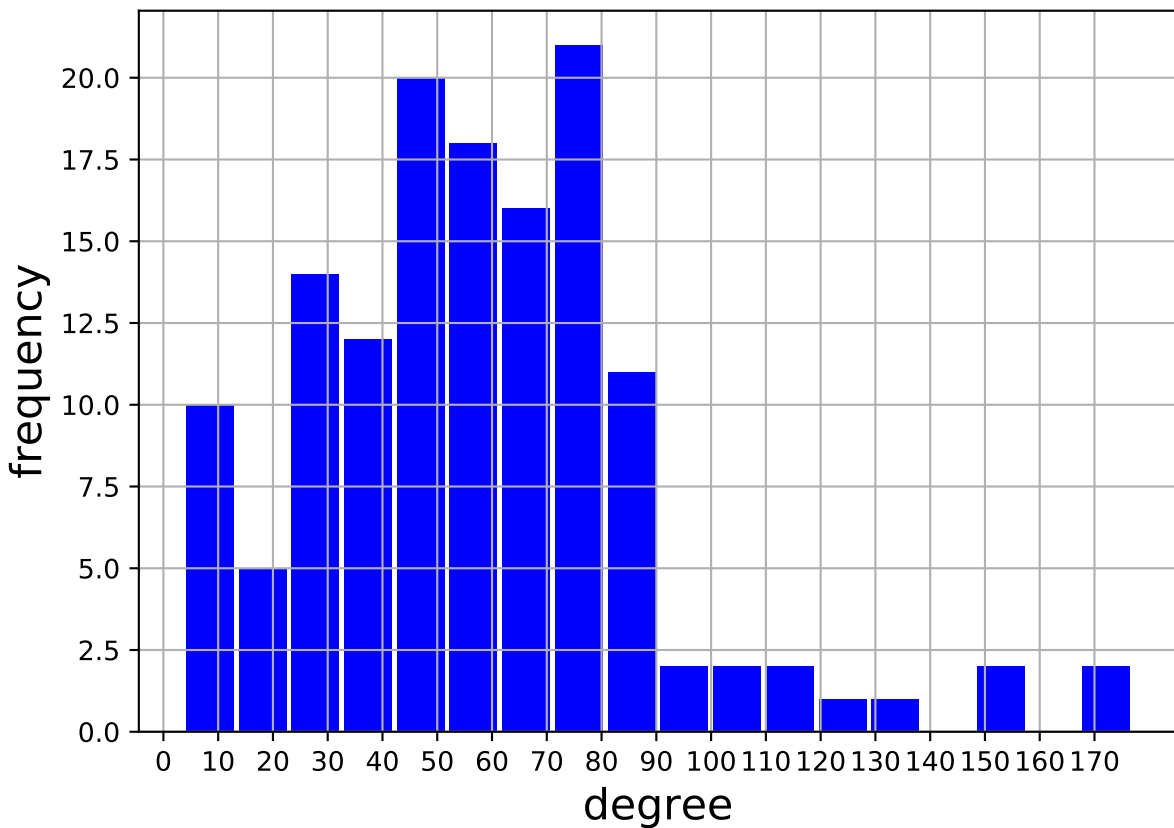

Supplement: supplementary_material [file attachment]

Avg AUC

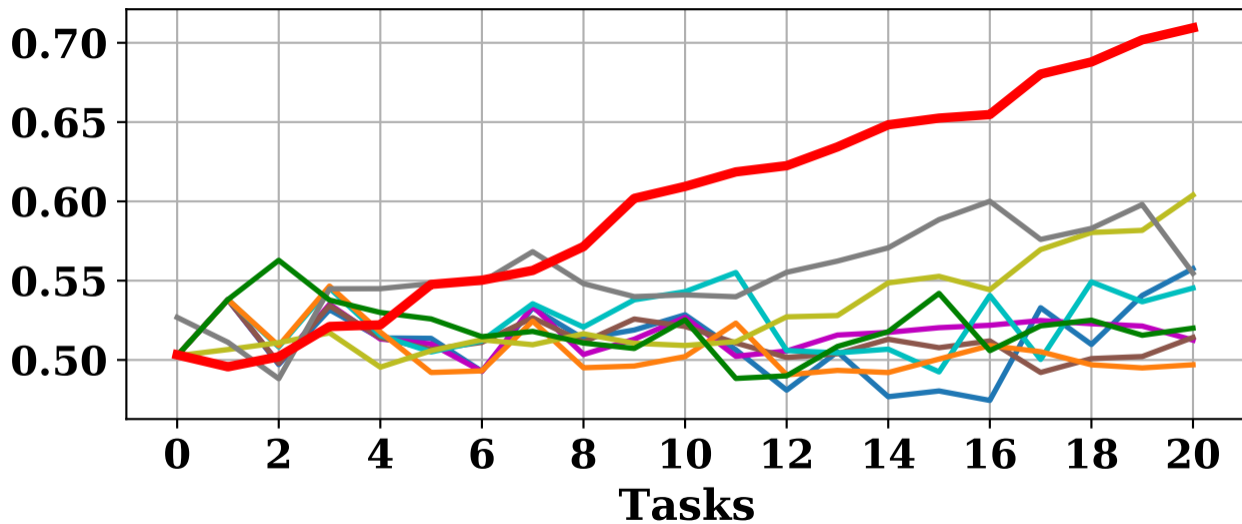

Supplement: supplementary_material [file attachment]

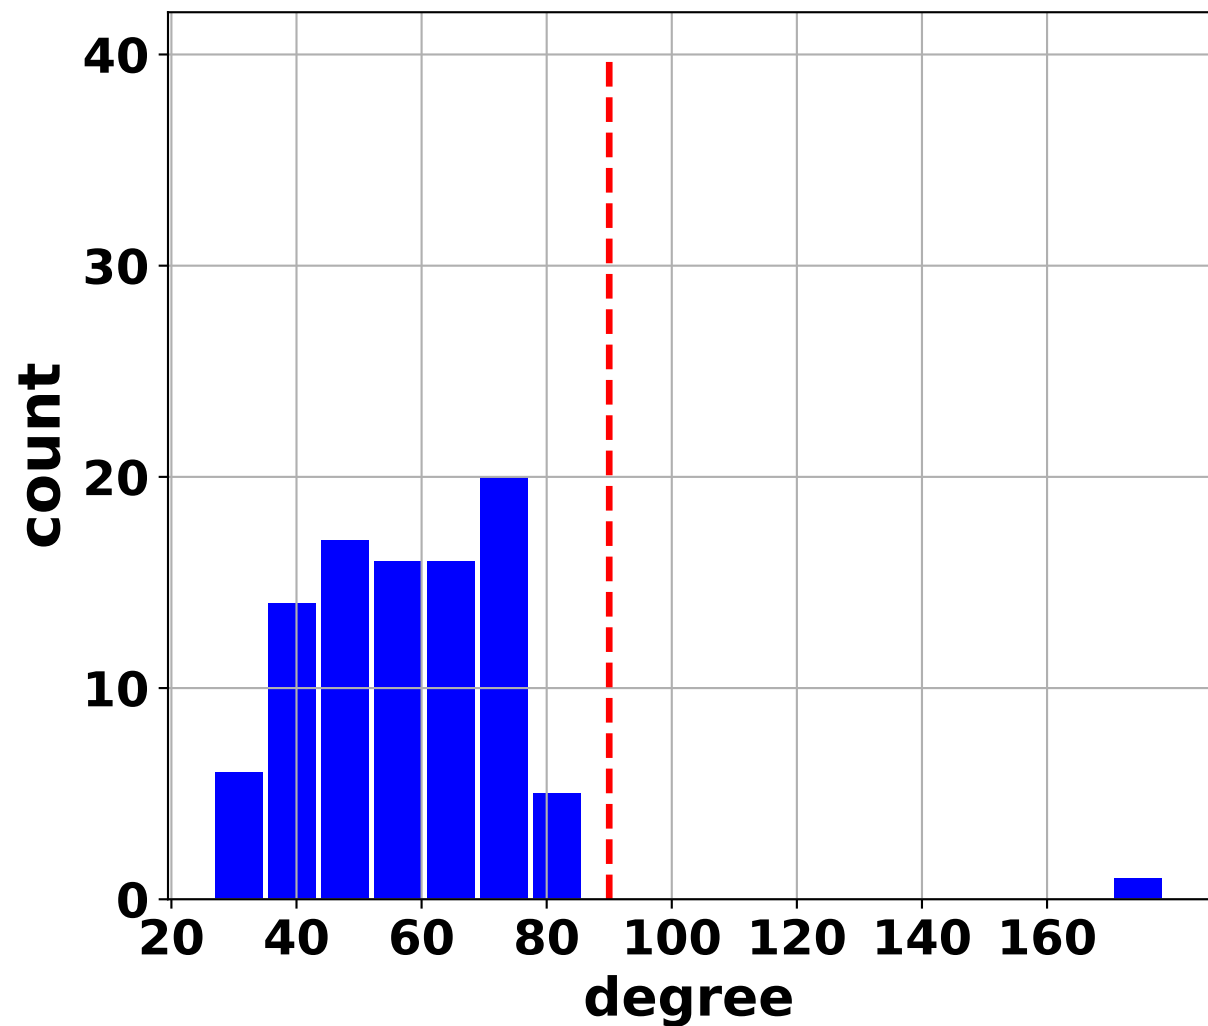

Supplement: supplementary_material [file attachment]

Avg AUC

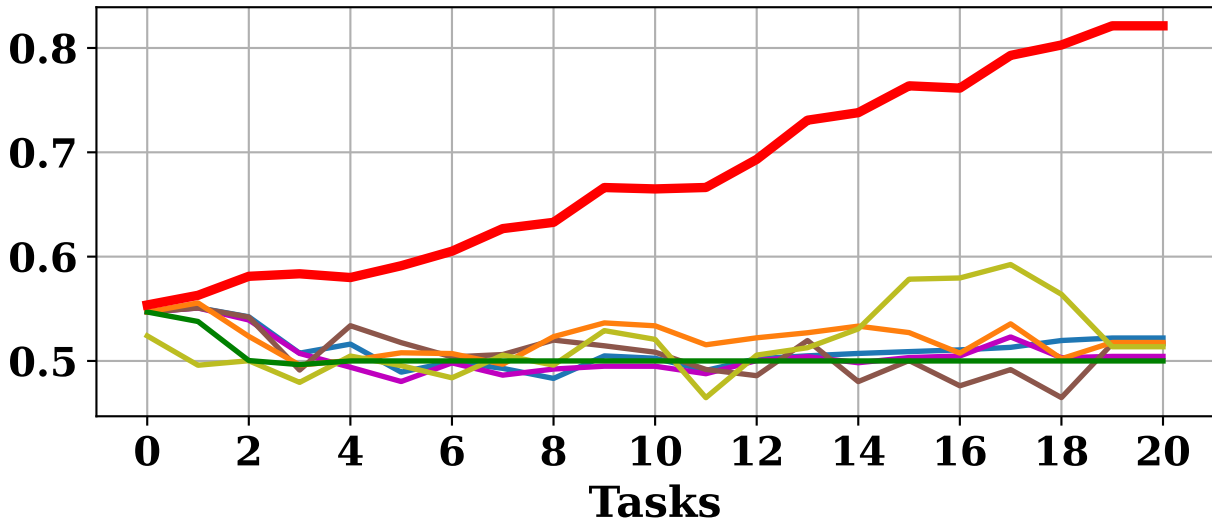

Supplement: supplementary_material [file attachment]

Distributions of the angles between  $g_{ref}$  and  $g_{cur}$

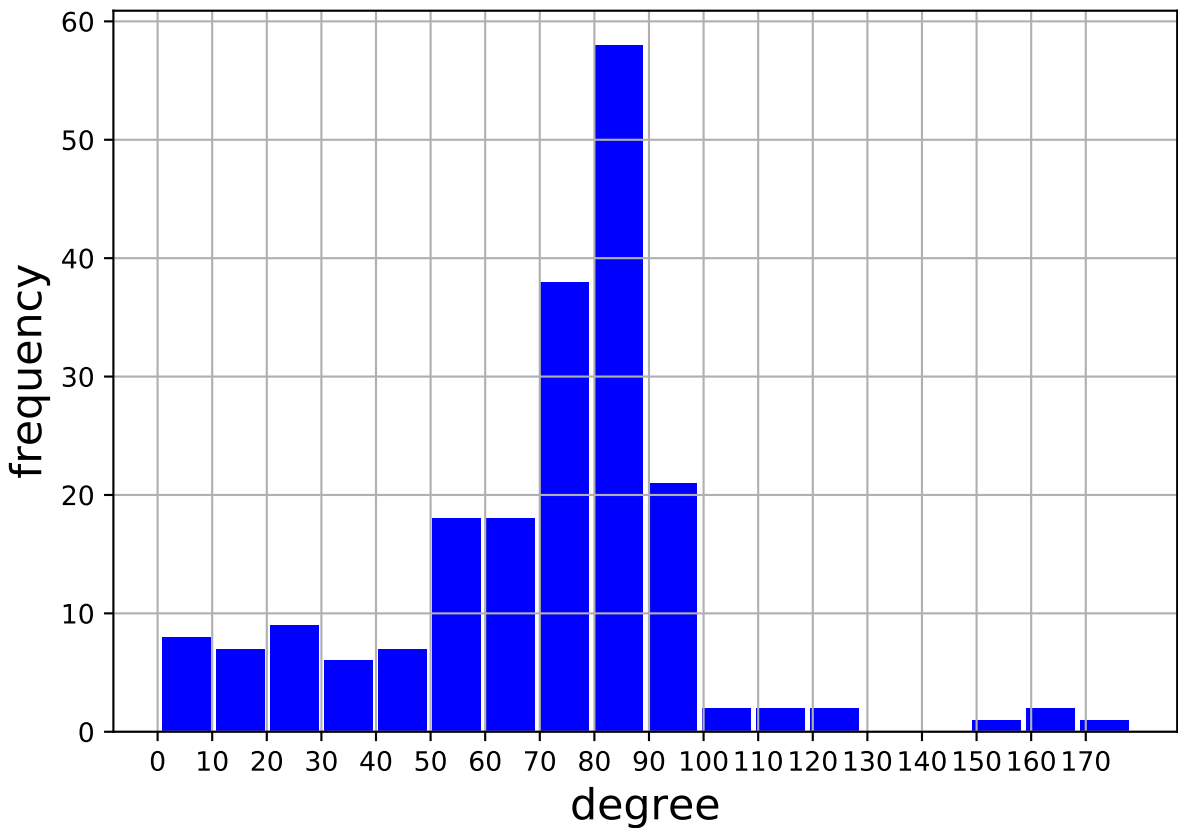

Supplement: supplementary_material [file attachment]

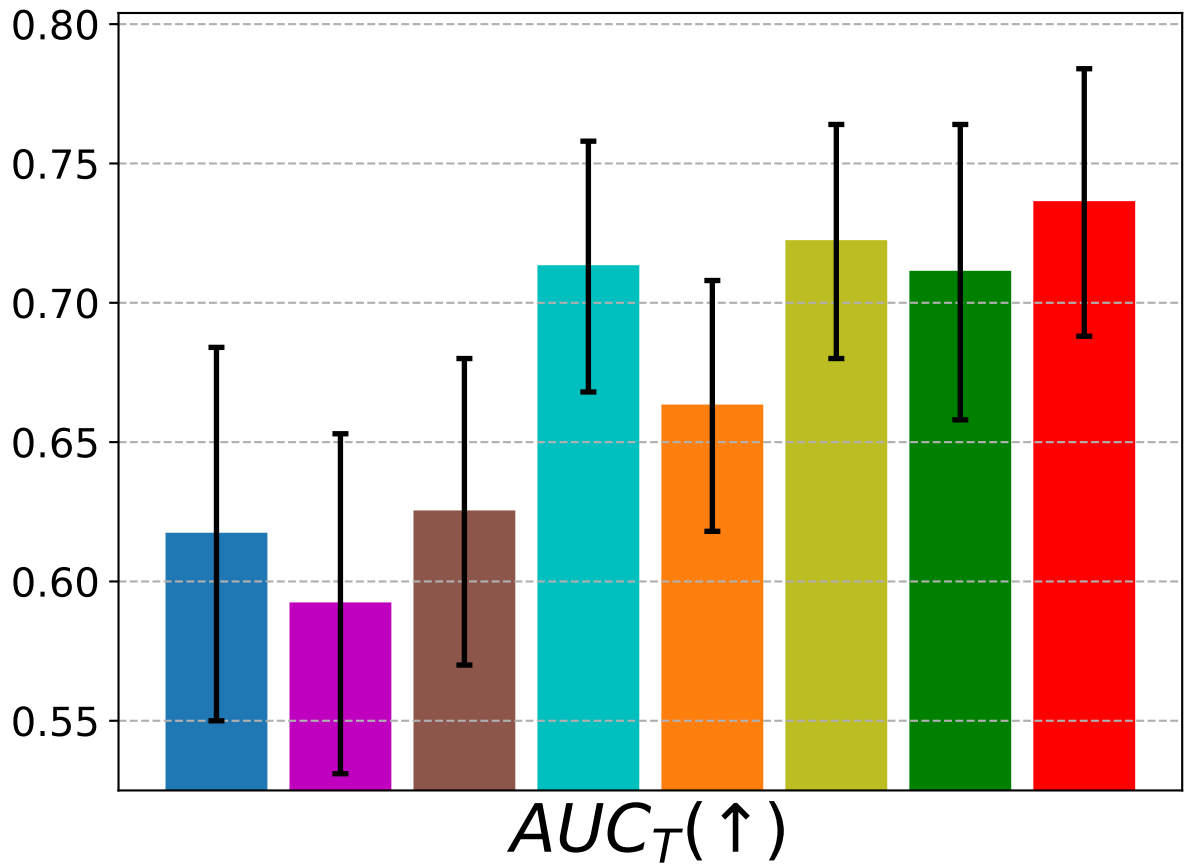

Supplement: supplementary_material [file attachment]

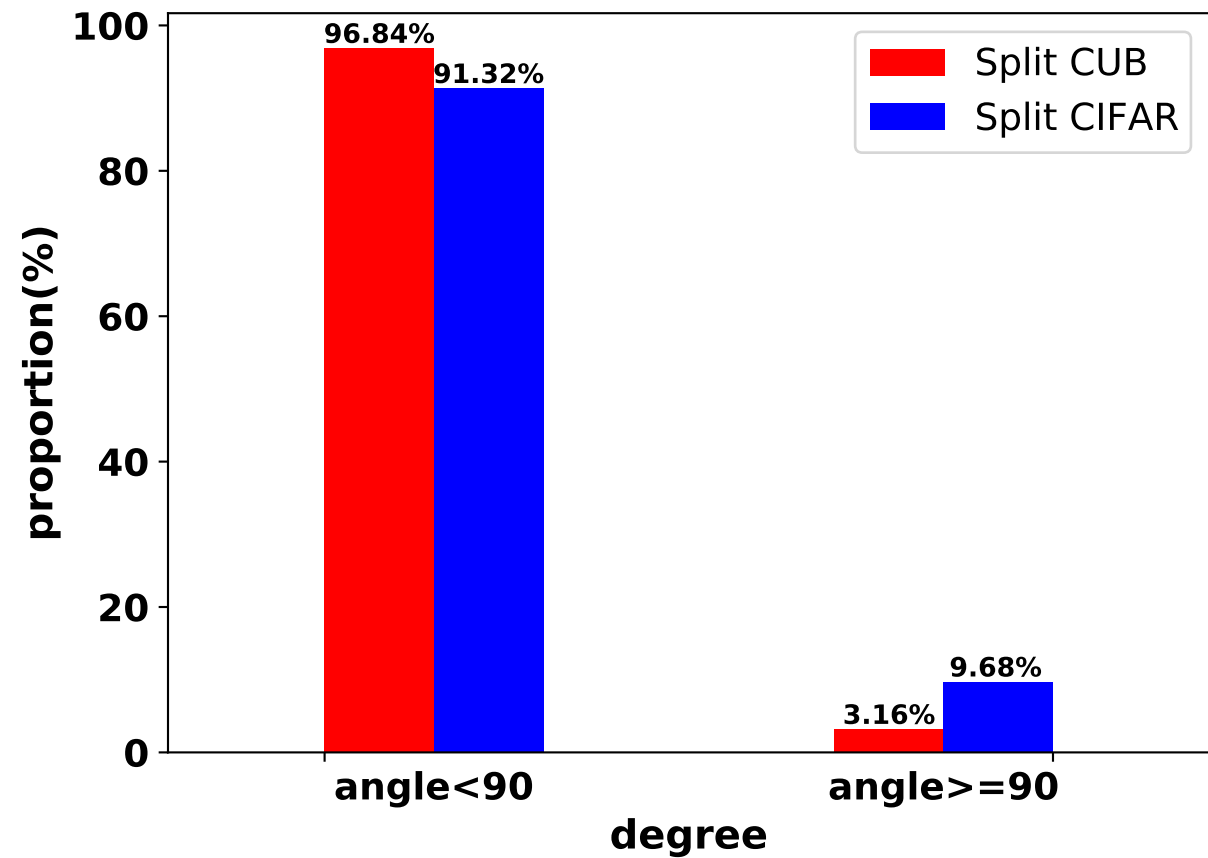

Supplement: supplementary_material [file attachment]

Distributions of the angles between  $g_{ref}$  and  $g_{cur}$

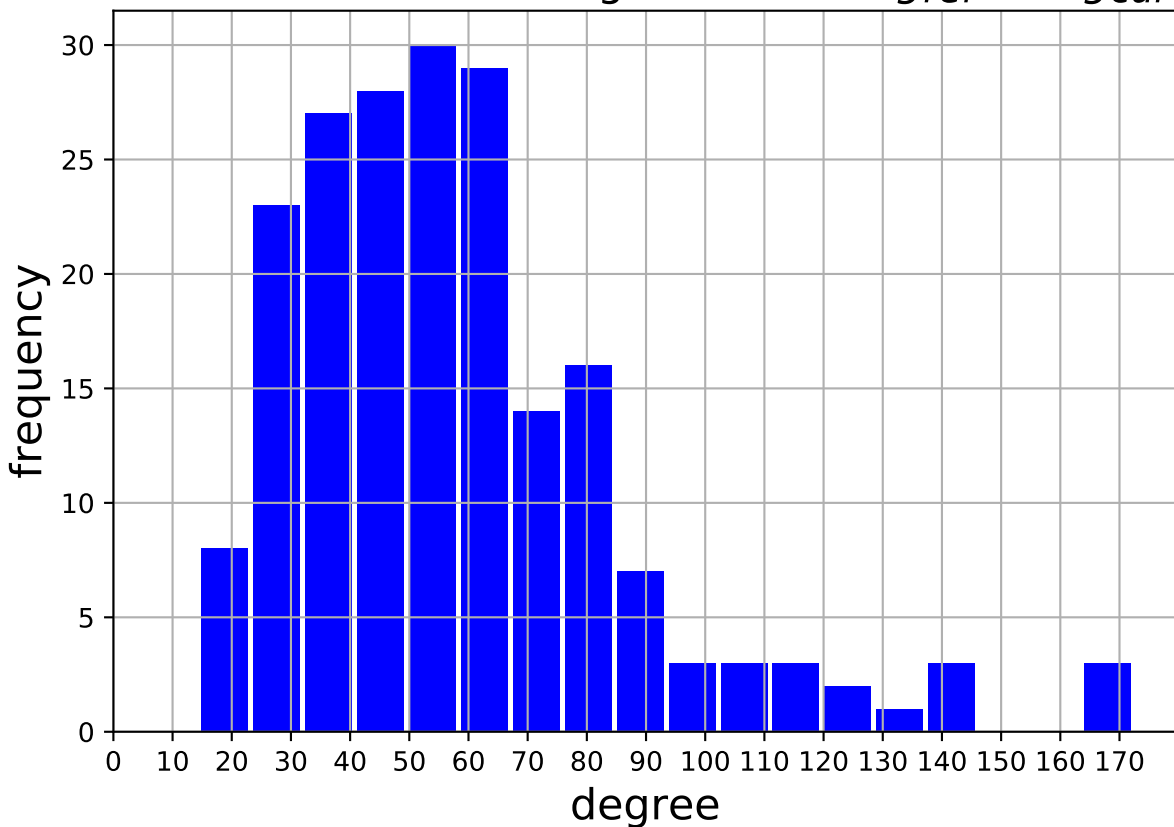

Supplement: supplementary_material [file attachment]

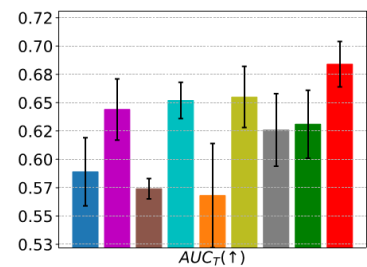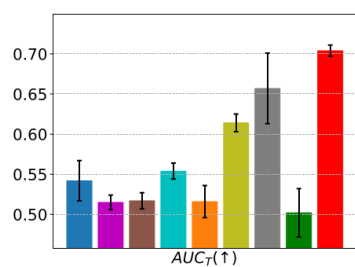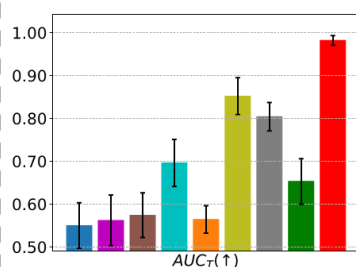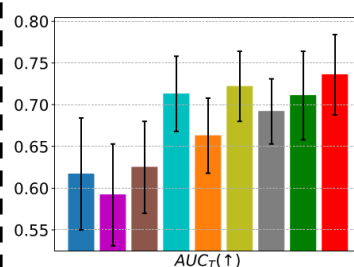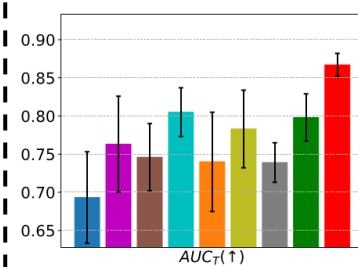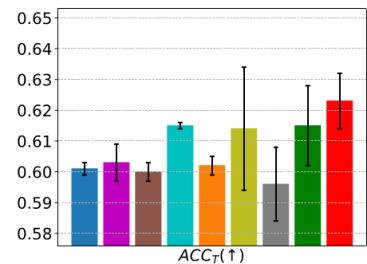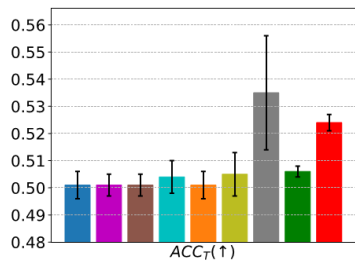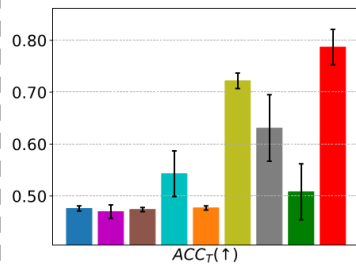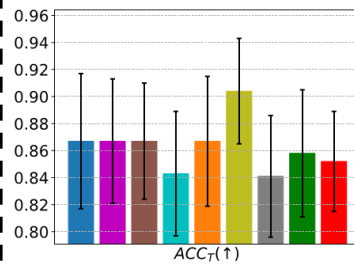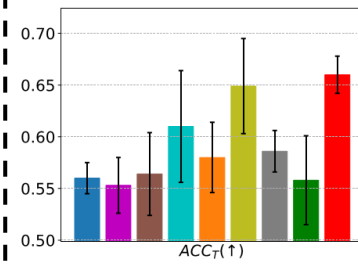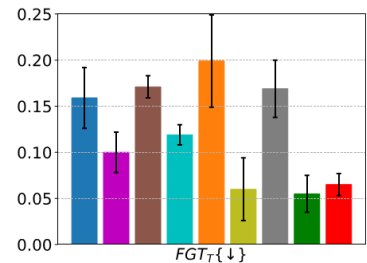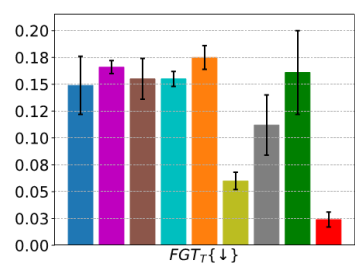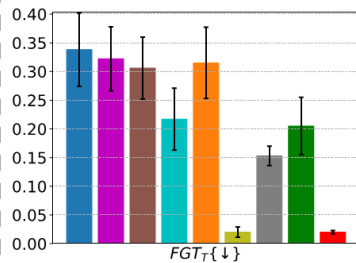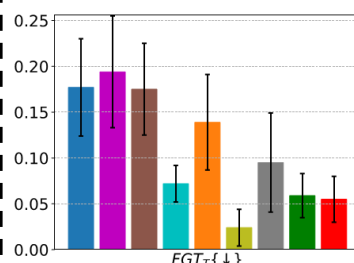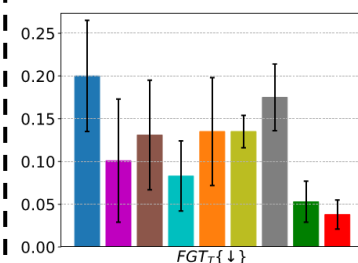

(a) Split-CIFAR

(b) Split-CUB

(c) Split-AWA2

(d) ISIC2019

(e) EuroSat

Supplement: supplementary_material [file attachment]

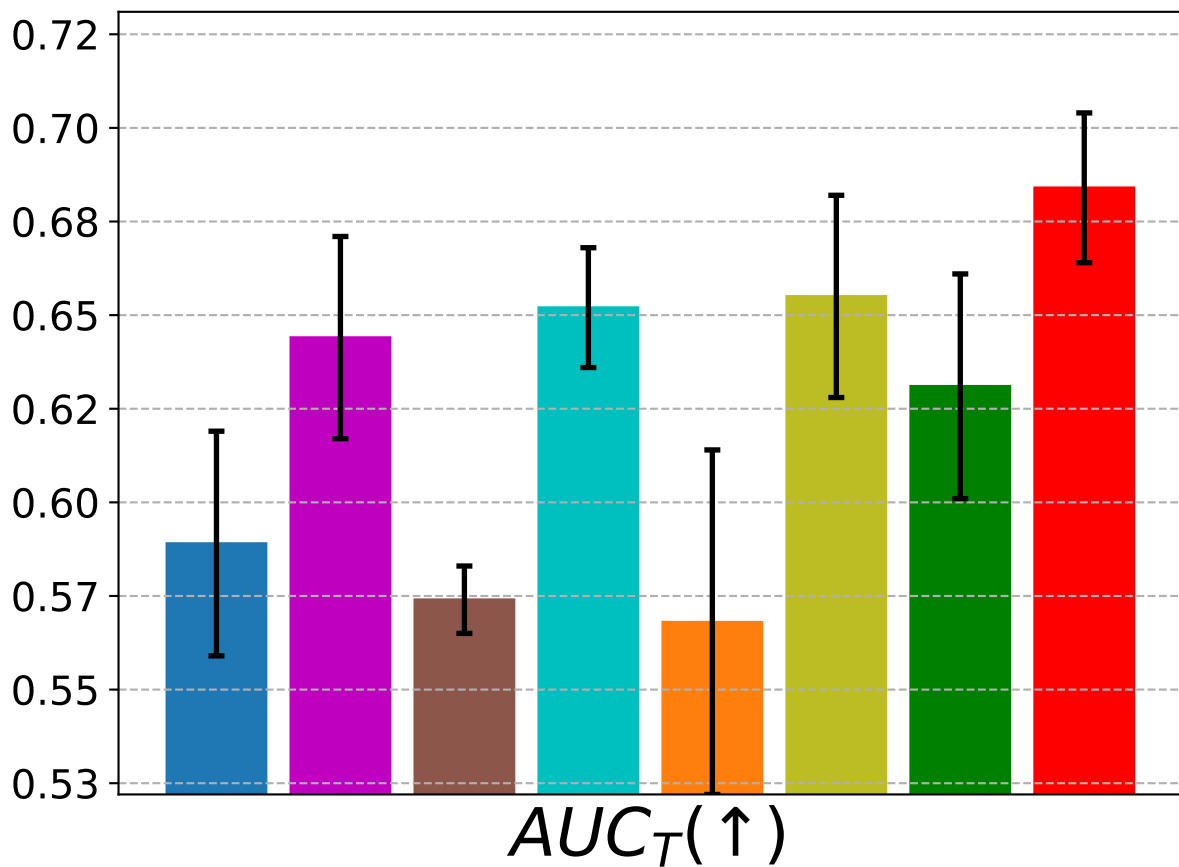

Supplement: supplementary_material [file attachment]

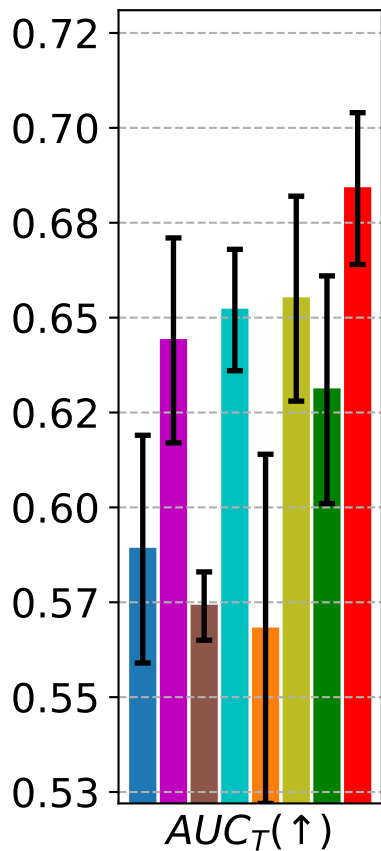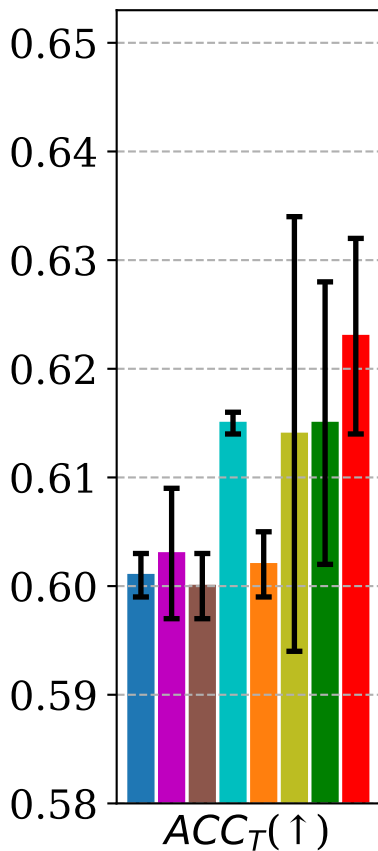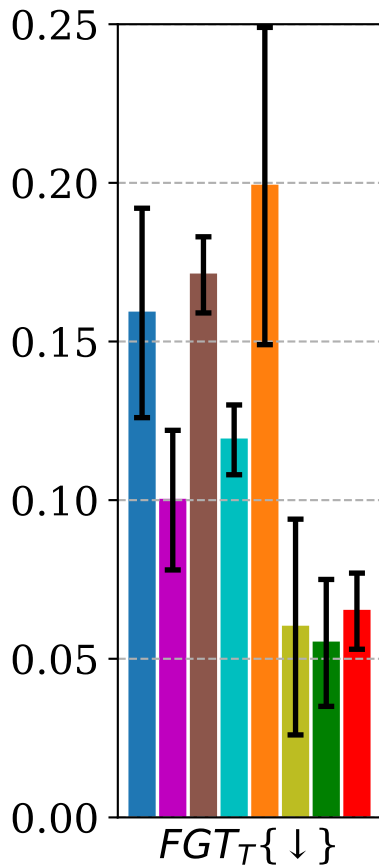

Supplement: supplementary_material [file attachment]

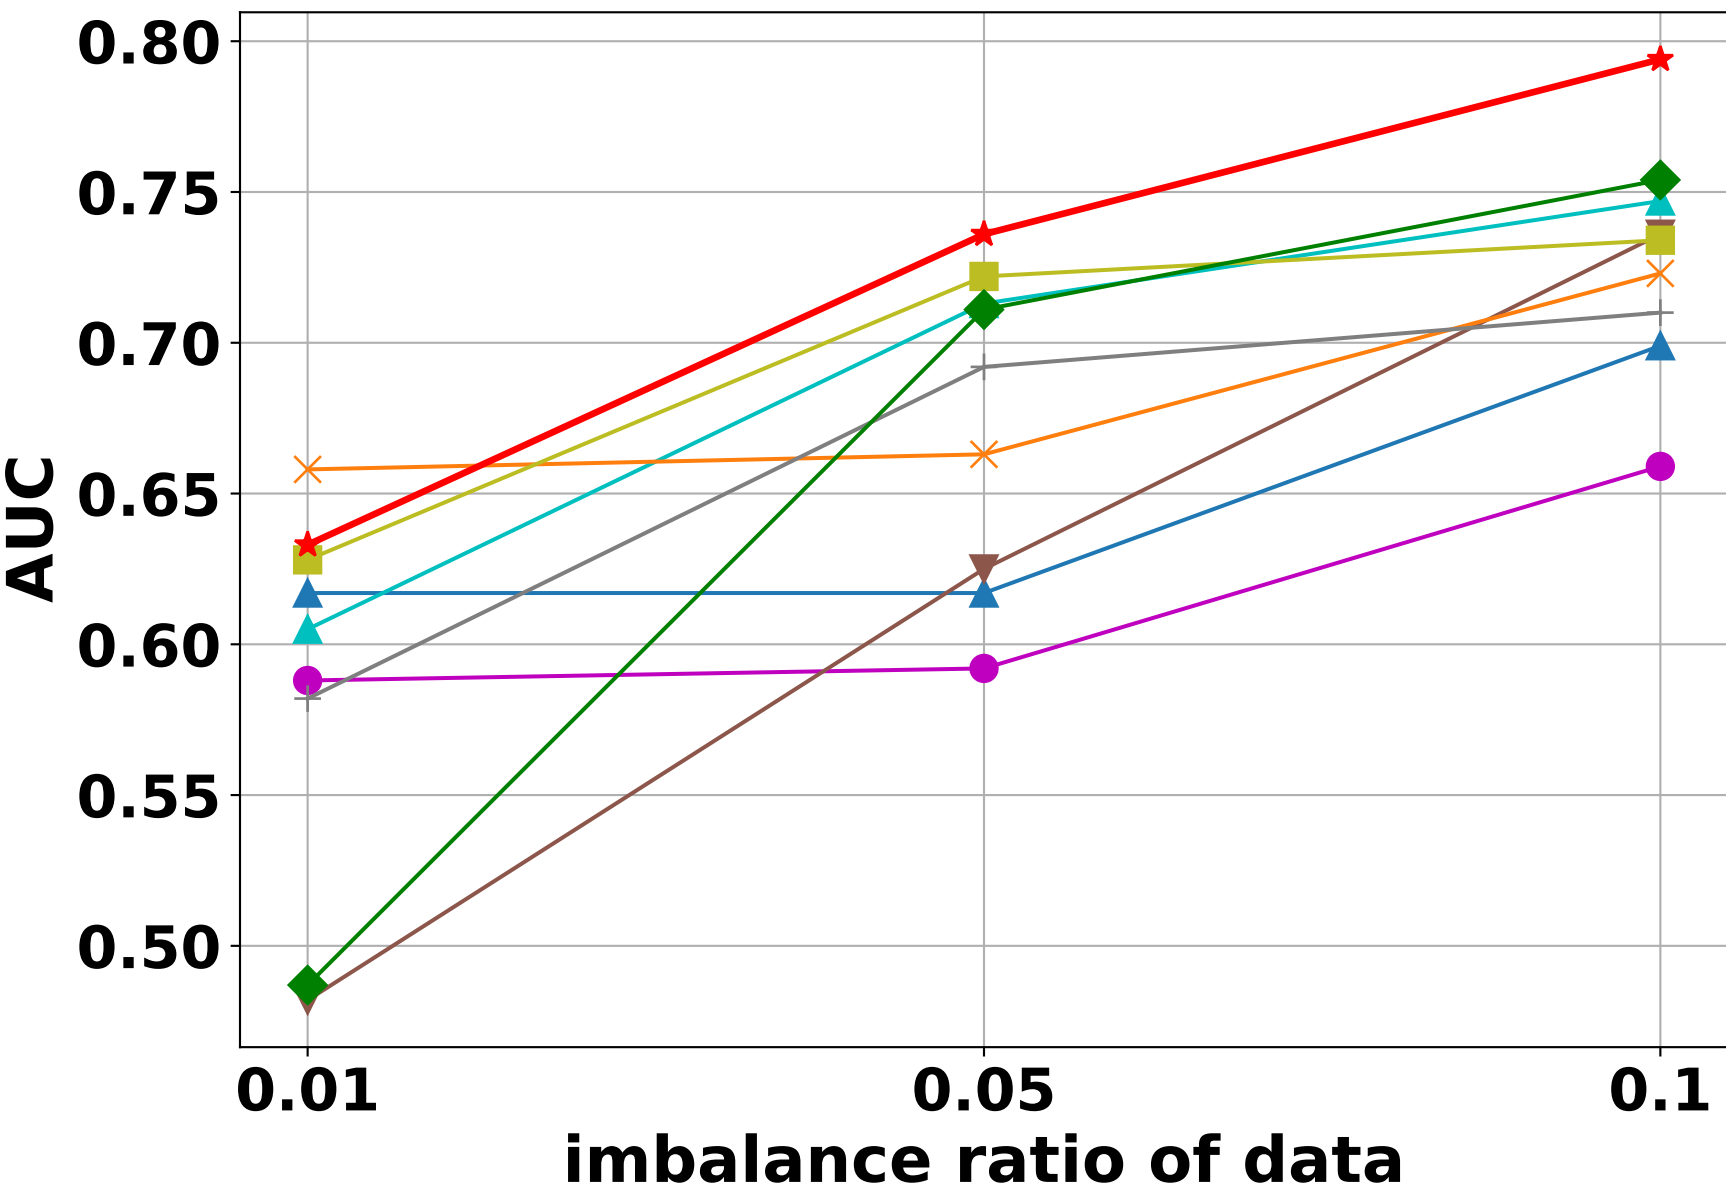

Supplement: supplementary_material [file attachment]
